# Supplementary material for: Assessing taxonomic metagenome profilers with OPAL
Source: Springer Nature journal article supplement (doi:10.1186/s13059-019-1646-y), 2019-03-04
Supplement: 13059_2019_1646_MOESM1_ESM.pdf [file 13059_2019_1646_MOESM1_ESM.pdf]

# Assessing taxonomic metagenome profilers with OPAL

Fernando Meyer, Andreas Bremges, Peter Belmann, Stefan Janssen, Alice C. McHardy, David Koslicki

**Table S1.** Assessed profiling software, used parameters, and corresponding Bioboxes available as Docker images on Docker Hub.

| Software        | Parameters                                                                                                                                                                            | Biobox docker image                              |
|-----------------|---------------------------------------------------------------------------------------------------------------------------------------------------------------------------------------|--------------------------------------------------|
| CommonKmers     | <code>-p &lt;num_cpus&gt; -Q C -k sensitive --normalize</code>                                                                                                                        | stefanjanssen/docker_profiling_tools:commonkmers |
| FOCUS CAMI      | <code>-m 0.001 -c bd -k 8</code>                                                                                                                                                      | stefanjanssen/docker_profiling_tools:focus       |
| Quikr 1.0.0     | <code>-n 10 -t SEK</code>                                                                                                                                                             | stefanjanssen/docker_profiling_tools:quikr       |
| mOTU 1.1        | <code>--processors=&lt;num_cpus&gt; &lt;readfile&gt;</code>                                                                                                                           | stefanjanssen/docker_profiling_tools:motu        |
| Metaphlan 2.2.0 | <code>--mpa_pk1 db_v20/mpa_v20_m200.pk1 --input_type fastq --nproc &lt;num_cpus&gt; --bowtie2db db_v20/mpa_v20_m200 --bowtie2out /tmp/out.bowtie2 --output_file &lt;output&gt;</code> | stefanjanssen/docker_profiling_tools:metaphlan2  |
| MetaPhyler 1.25 | <code>&lt;readfile&gt; blastn &lt;output&gt; &lt;num_cpus&gt;</code>                                                                                                                  | stefanjanssen/docker_profiling_tools:metaphyler  |
| TIPP 2.0.0      | <code>ENV REFERENCE \$PREFIX/share/tipp/</code>                                                                                                                                       | stefanjanssen/docker_profiling_tools:tipp        |

**Table S2.** Run time in hours and maximum memory usage in gigabytes (in parentheses) required by profilers to process different datasets.

| Software        | CAMI I high complexity dataset | CAMI II mouse gut dataset | HMP Mock Community dataset |
|-----------------|--------------------------------|---------------------------|----------------------------|
| Metaphlan 2.2.0 | 2.13h (1.44GB)                 | 12.50h (1.66GB)           | 0.09h (1.41GB)             |
| FOCUS CAMI      | 2.34h (4.99GB)                 | 13.45h (4.99GB)           | 0.07h (5.12GB)             |
| Quikr           | 2.12h (24.12GB)                | 16.32h (26.12GB)          | 0.25h (24.62GB)            |
| mOTU 1.1        | 3.82h (1.19GB)                 | 19.83h (1.19GB)           | 0.15h (1.01GB)             |
| CommonKmers     | 11.28h (24.16GB)               | 76.82h (26.03GB)          | 0.61h (21.92GB)            |
| MetaPhyler 1.25 | 31.16h (6.85GB)                | 119.51h (2.56GB)          | 0.44h (1.92GB)             |
| TIPP 2.0.0      | 32.01h (81.53GB)               | 151.01h (67.51GB)         | -                          |

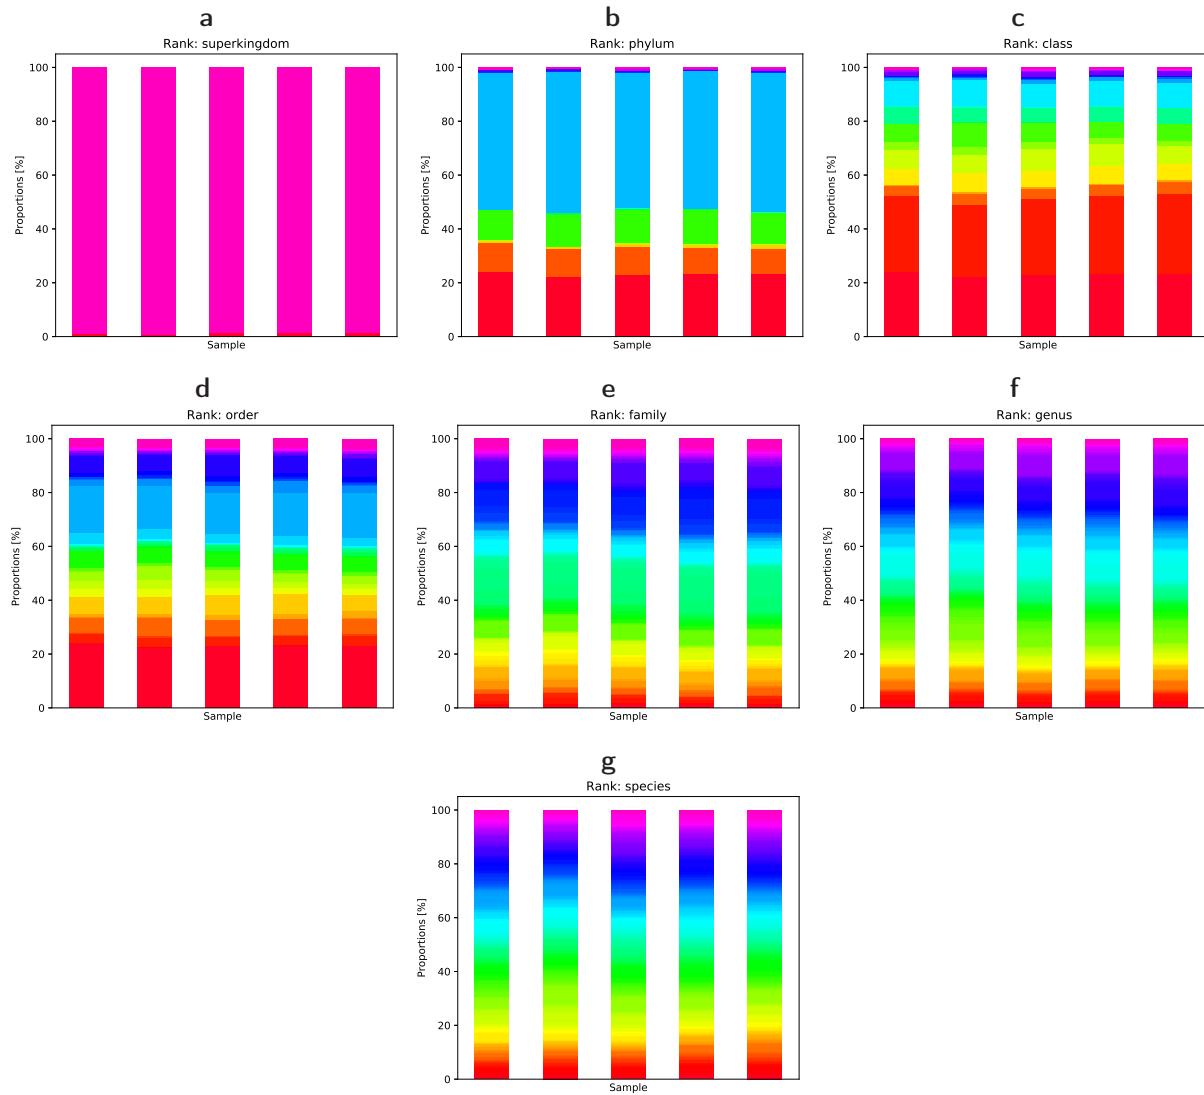

**Fig. S1. Taxa proportions per sample for the CAMI I high complexity dataset at different taxonomic ranks.** At the superkingdom level, most organisms in all samples are Bacteria, with the proportion of Archaea varying between 0.8 and 1.5%.

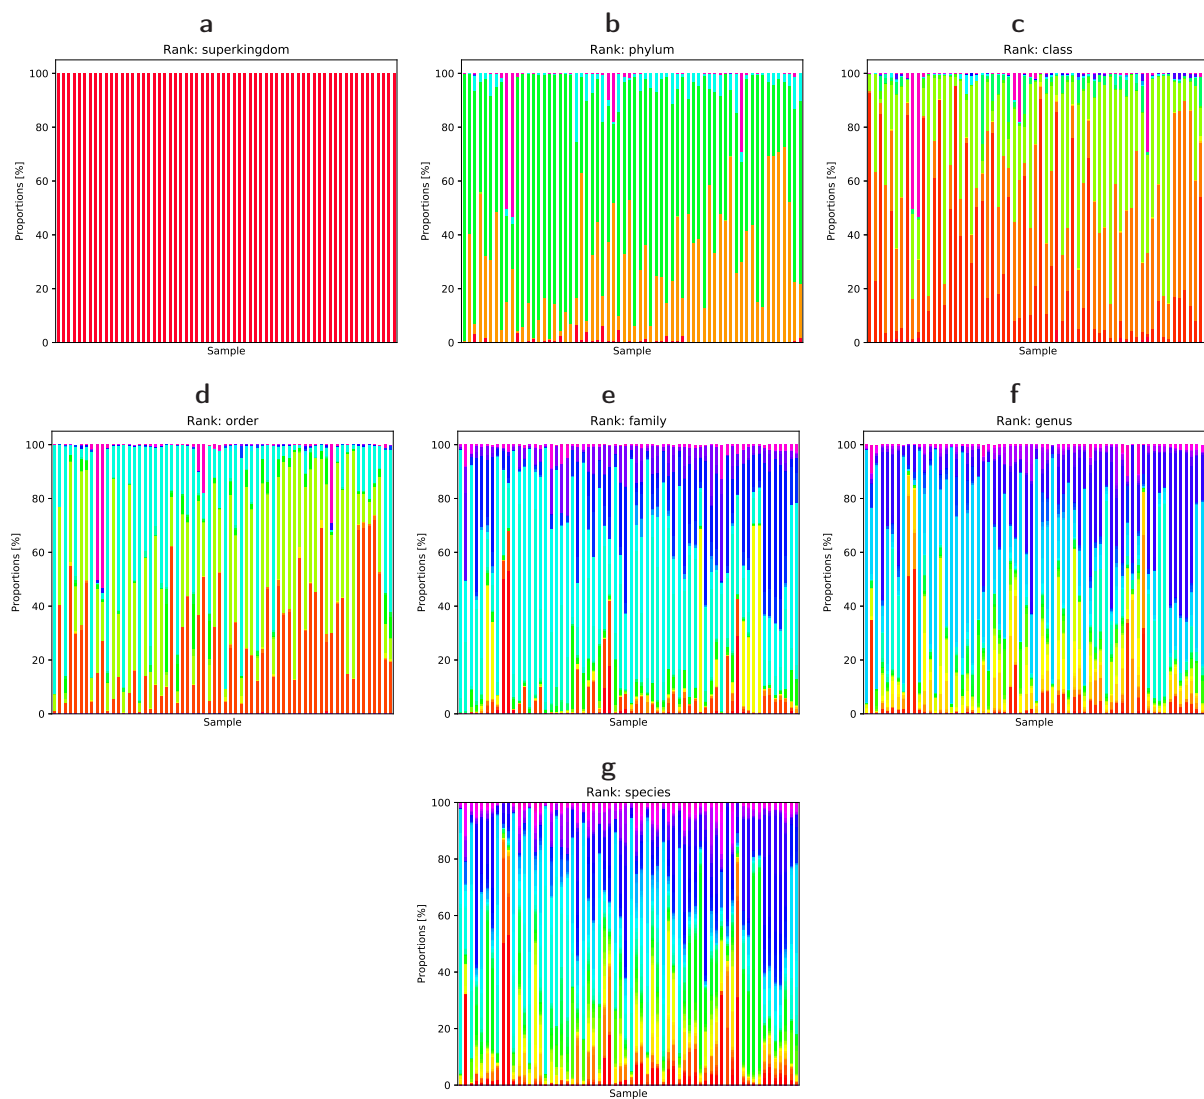

**Fig. S2. Taxa proportions per sample for the CAMI II mouse gut dataset at different taxonomic ranks.** At the superkingdom level, 100% of the organisms in all samples are Bacteria.

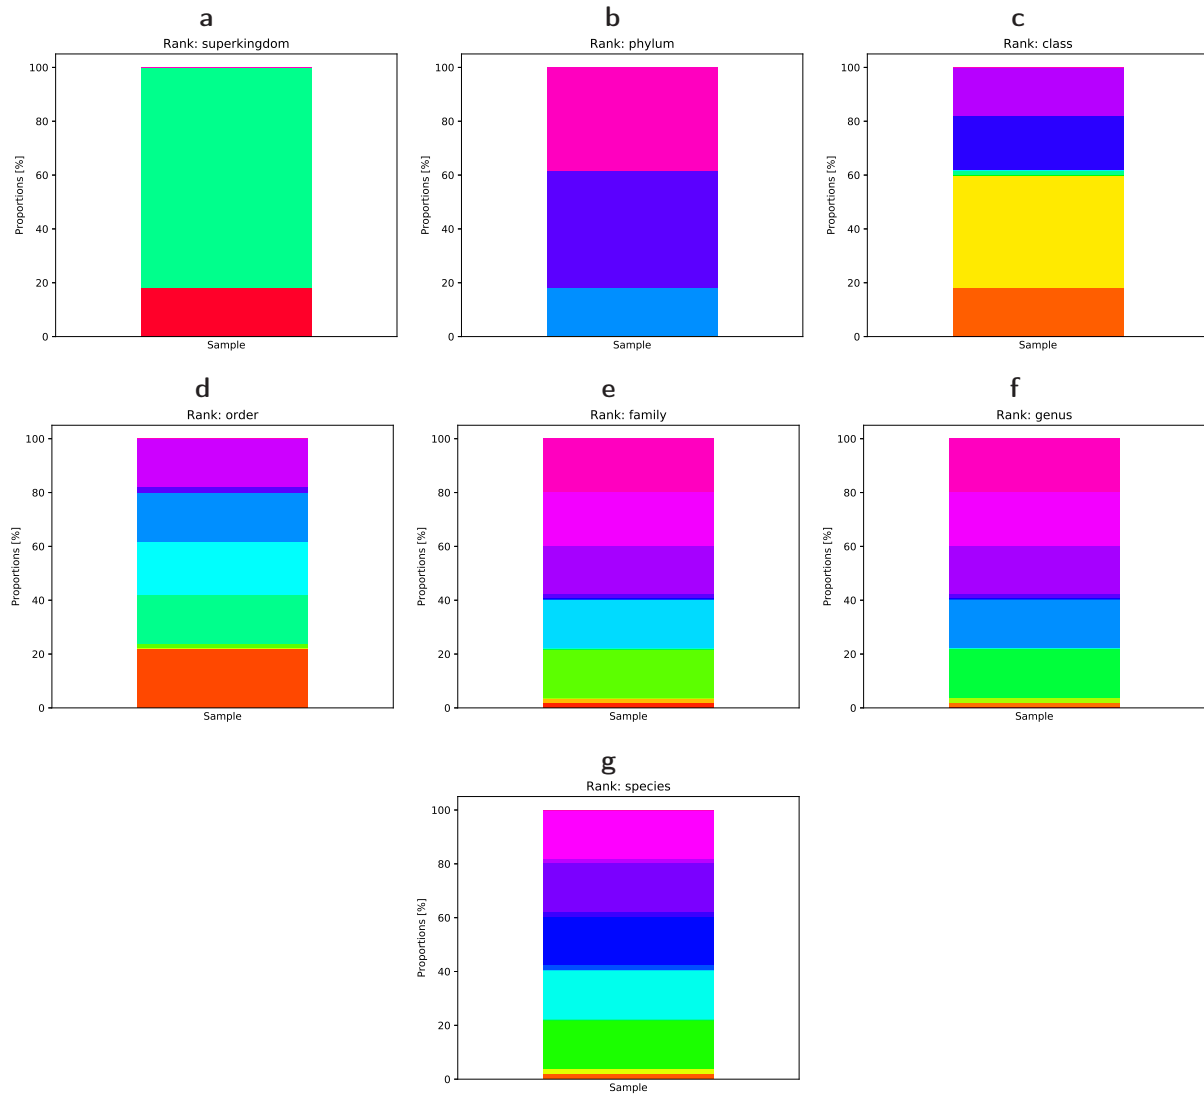

**Fig. S3. Taxa proportions for the HMP Mock Community dataset, staggered sample, at different taxonomic ranks.** This dataset contains 22 species, with 82.01%, 17.97%, and 0.02% of relative abundance being Bacteria, Archaea, and Eukaryota, respectively.

— superkingdom — phylum — class — order — family — genus — species — strain

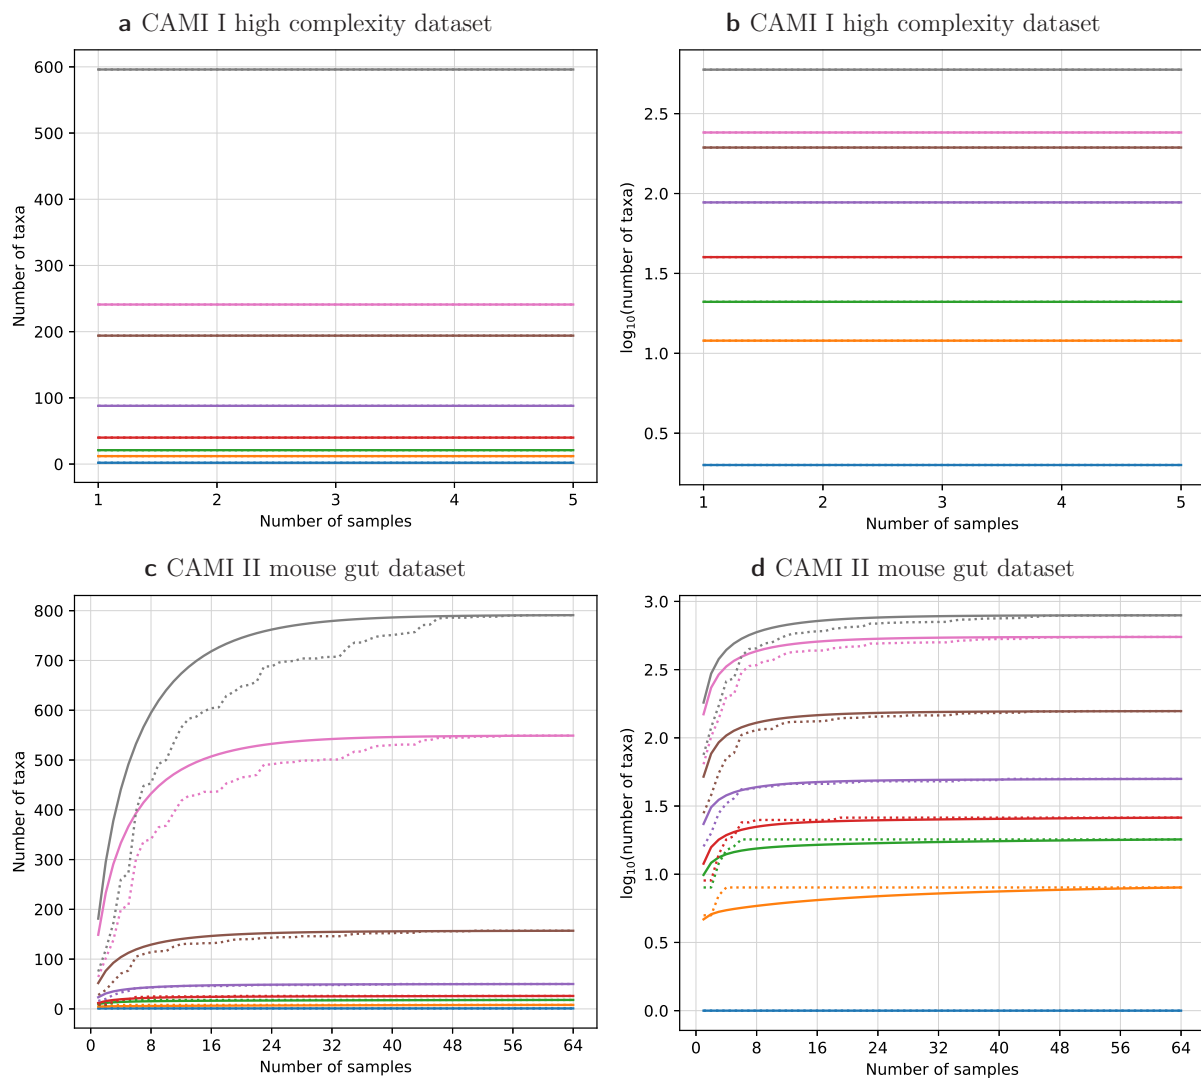

**Fig. S4. Rarefaction curves (solid lines) for the CAMI I high complexity dataset (a-b) and the CAMI II mouse gut dataset (c-d) at different taxonomic ranks. Dotted lines are accumulation curves. b and d are in logarithmic scale with base 10. OPAL always assumes that the samples are from the same environment.**

a CAMI I high complexity dataset

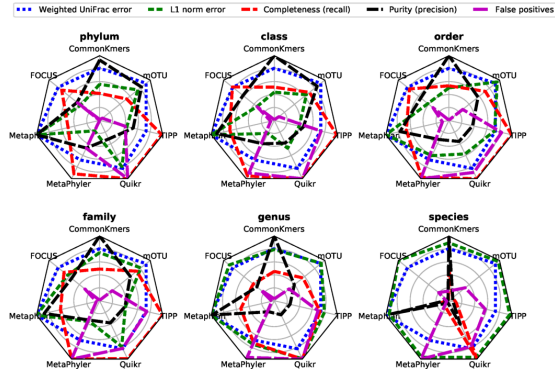

b CAMI I high complexity dataset

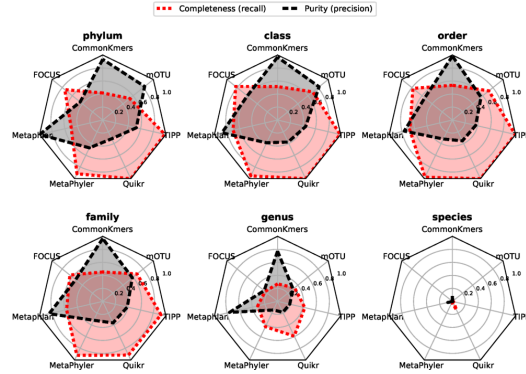

c HMP Mock Community dataset

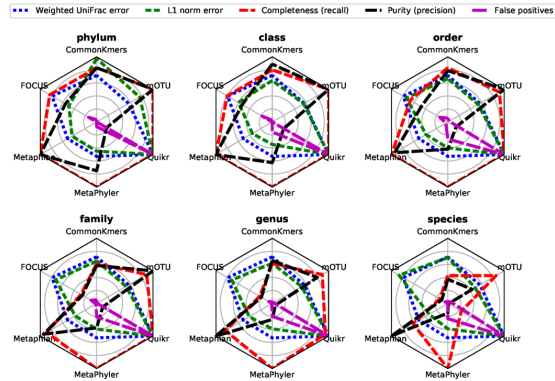

d HMP Mock Community dataset

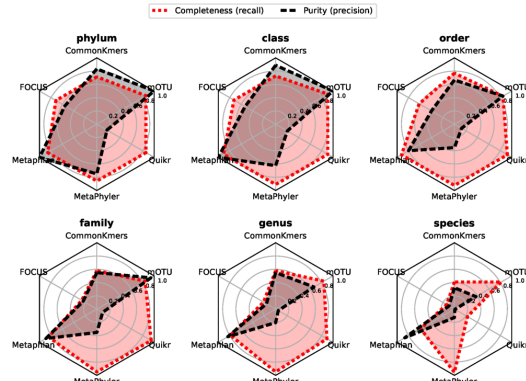

e CAMI I high complexity dataset

| Ranking per metric | Software (score)  |                  |                  |                  |                   |
|--------------------|-------------------|------------------|------------------|------------------|-------------------|
|                    | Completeness      | Purity           | L1 norm          | Weighted UniFrac | Sum of scores     |
| 1 <sup>st</sup>    | Quikr (9)         | CommonKmers (4)  | MetaPhyler (14)  | MetaPhyler (0)   | TIPP (184)        |
| 2 <sup>nd</sup>    | TIPP (31)         | Metaphlan (23)   | FOCUS (37)       | TIPP (5)         | MetaPhyler (185)  |
| 3 <sup>rd</sup>    | MetaPhyler (35)   | mOTU (49)        | TIPP (52)        | CommonKmers (13) | CommonKmers (220) |
| 4 <sup>th</sup>    | FOCUS (95)        | FOCUS (83)       | CommonKmers (59) | Quikr (15)       | FOCUS (232)       |
| 5 <sup>th</sup>    | mOTU (98)         | TIPP (96)        | Quikr (99)       | FOCUS (17)       | Quikr (257)       |
| 6 <sup>th</sup>    | Metaphlan (113)   | Quikr (134)      | mOTU (116)       | mOTU (25)        | mOTU (288)        |
| 7 <sup>th</sup>    | CommonKmers (144) | MetaPhyler (136) | Metaphlan (148)  | Metaphlan (30)   | Metaphlan (314)   |

f HMP Mock Community dataset

| Ranking per metric | Software (score) |                  |                  |                  |                  |
|--------------------|------------------|------------------|------------------|------------------|------------------|
|                    | Completeness     | Purity           | L1 norm          | Weighted UniFrac | Sum of scores    |
| 1 <sup>st</sup>    | MetaPhyler (0)   | Metaphlan (2)    | Metaphlan (2)    | Metaphlan (0)    | Metaphlan (12)   |
| 2 <sup>nd</sup>    | Metaphlan (8)    | mOTU (3)         | MetaPhyler (3)   | MetaPhyler (1)   | MetaPhyler (20)  |
| 3 <sup>rd</sup>    | Quikr (8)        | CommonKmers (10) | mOTU (11)        | mOTU (2)         | mOTU (30)        |
| 4 <sup>th</sup>    | mOTU (14)        | MetaPhyler (16)  | CommonKmers (17) | CommonKmers (3)  | CommonKmers (50) |
| 5 <sup>th</sup>    | CommonKmers (20) | FOCUS (19)       | FOCUS (17)       | FOCUS (4)        | Quikr (63)       |
| 6 <sup>th</sup>    | FOCUS (25)       | Quikr (25)       | Quikr (25)       | Quikr (5)        | FOCUS (65)       |

**Fig. S5. Assessment results on the CAMI I high complexity (a, b, e) and the HMP Mock Community (c, d, f) datasets.** **a, c** Relative performance plots with results for the metrics weighted UniFrac, L1 norm, completeness, purity, and number of false positives at different taxonomic ranks. The values of the metrics in these plots are normalized by the maximum value attained by any profiler at a certain rank. **b, d** Absolute performance plots with results for the metrics completeness and recall, ranging between 0 and 1. **e, f** Rankings of the profilers according to their performance and scores for different metrics computed over all samples and taxonomic ranks. For details, see main text.

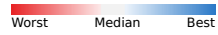

### a superkingdom - CAMI I high complexity dataset

| Presence/absence of taxa |                  |                  |                  |                 |                     |                  |                    |                 |
|--------------------------|------------------|------------------|------------------|-----------------|---------------------|------------------|--------------------|-----------------|
| Tool                     | Gold standard    | CommonKmers      | FOCUS            | Metaphlan       | MetaPhyler          | Quirk            | TIPP               | mOTU            |
| Completeness (recall)    | 1 (0)            | 1 (0)            | 1 (0)            | 1 (0)           | 1 (0)               | 1 (0)            | 1 (0)              | 1 (0)           |
| Purity (precision)       | 1 (0)            | 0.867 (0.0816)   | 1 (0)            | 1 (0)           | 1 (0)               | 0.667 (0)        | 1 (0)              | 1 (0)           |
| F1 score                 | 1 (0)            | 0.92 (0.049)     | 1 (0)            | 1 (0)           | 1 (0)               | 0.8 (0)          | 1 (0)              | 1 (0)           |
| True positives           | 2 (0)            | 2 (0)            | 2 (0)            | 2 (0)           | 2 (0)               | 2 (0)            | 2 (0)              | 2 (0)           |
| False positives          | 0 (0)            | 0.4 (0.245)      | 0 (0)            | 0 (0)           | 0 (0)               | 1 (0)            | 0 (0)              | 0 (0)           |
| False negatives          | 0 (0)            | 1 (0)            | 0 (0)            | 0 (0)           | 0 (0)               | 0 (0)            | 0 (0)              | 0 (0)           |
| Jaccard index            | 1 (0)            | 0.867 (0.0816)   | 1 (0)            | 1 (0)           | 1 (0)               | 0.667 (0)        | 1 (0)              | 1 (0)           |
| Abundance estimates      |                  |                  |                  |                 |                     |                  |                    |                 |
| Weighted UniFrac error   | 0 (0)            | 7.65 (0.0572)    | 7.79 (0.0963)    | 8.49 (0.0828)   | 6.45 (0.0196)       | 7.81 (0.0582)    | 7 (0.0352)         | 8.74 (0.0447)   |
| Unweighted UniFrac error | 0 (0)            | 5.56e+03 (97.8)  | 5.52e+03 (79.2)  | 6.27e+03 (39.1) | 5.22e+03 (38.3)     | 1e+04 (148)      | 7.46e+03 (49.6)    | 6.48e+03 (68.7) |
| L1 norm error            | 0 (0)            | 0.0241 (0.00431) | 0.0388 (0.00654) | 0.14 (0.0223)   | 0.000988 (7.46e-05) | 0.0668 (0.00405) | 0.0081 (0.000946)  | 0.258 (0.0373)  |
| Bray-Curtis distance     | 0 (0)            | 0.012 (0.00216)  | 0.0194 (0.00327) | 0.0701 (0.0102) | 0.000484 (3.73e-05) | 0.0334 (0.00203) | 0.00405 (0.000473) | 0.129 (0.0186)  |
| Alpha diversity          |                  |                  |                  |                 |                     |                  |                    |                 |
| Taxon counts             | 2 (0)            | 2.4 (0.245)      | 2 (0)            | 2 (0)           | 2 (0)               | 3 (0)            | 2 (0)              | 2 (0)           |
| Shannon diversity        | 0.0635 (0.00643) | 0.114 (0.0149)   | 0.138 (0.0086)   | 0.28 (0.0291)   | 0.063 (0.00648)     | 0.214 (0.0032)   | 0.0807 (0.00758)   | 0.399 (0.0379)  |
| Shannon equitability     | 0.0916 (0.00928) | 0.134 (0.0128)   | 0.2 (0.0124)     | 0.403 (0.0419)  | 0.0909 (0.00934)    | 0.195 (0.00291)  | 0.116 (0.0109)     | 0.576 (0.0546)  |

### b phylum - CAMI I high complexity dataset

| Presence/absence of taxa |                |                 |                  |                 |                  |                 |                 |                 |
|--------------------------|----------------|-----------------|------------------|-----------------|------------------|-----------------|-----------------|-----------------|
| Tool                     | Gold standard  | CommonKmers     | FOCUS            | Metaphlan       | MetaPhyler       | Quirk           | TIPP            | mOTU            |
| Completeness (recall)    | 1 (0)          | 0.417 (0)       | 0.75 (0.0456)    | 1 (0)           | 0.917 (0)        | 1 (0)           | 0.983 (0.0167)  | 0.533 (0.0425)  |
| Purity (precision)       | 1 (0)          | 0.933 (0.0408)  | 0.446 (0.02)     | 1 (0)           | 0.474 (0.00399)  | 0.319 (0.00209) | 0.532 (0.00904) | 0.828 (0.0605)  |
| F1 score                 | 1 (0)          | 0.675 (0.0708)  | 0.558 (0.0268)   | 0.667 (0)       | 0.625 (0.00349)  | 0.484 (0.0024)  | 0.69 (0.00961)  | 0.645 (0.0428)  |
| True positives           | 12 (0)         | 5 (0)           | 9 (0.548)        | 6 (0)           | 11 (0)           | 12 (0)          | 11.8 (0.2)      | 6.4 (0.51)      |
| False positives          | 0 (0)          | 0.4 (0.245)     | 11.2 (0.735)     | 8 (0)           | 12.2 (0.2)       | 10.4 (0.4)      | 1.4 (0.51)      | 1.4 (0.51)      |
| False negatives          | 0 (0)          | 7 (0)           | 3 (0.548)        | 6 (0)           | 1 (0)            | 0 (0)           | 0.2 (0.2)       | 5.6 (0.51)      |
| Jaccard index            | 1 (0)          | 0.404 (0.00785) | 0.389 (0.0257)   | 0.5 (0)         | 0.455 (0.00367)  | 0.319 (0.00209) | 0.527 (0.0111)  | 0.482 (0.0454)  |
| Abundance estimates      |                |                 |                  |                 |                  |                 |                 |                 |
| Weighted UniFrac error   | 0 (0)          | 7.65 (0.0572)   | 7.79 (0.0963)    | 8.49 (0.0828)   | 6.45 (0.0196)    | 7.81 (0.0582)   | 7 (0.0352)      | 8.74 (0.0447)   |
| Unweighted UniFrac error | 0 (0)          | 5.56e+03 (97.8) | 5.52e+03 (79.2)  | 6.27e+03 (39.1) | 5.22e+03 (38.3)  | 1e+04 (148)     | 7.46e+03 (49.6) | 6.48e+03 (68.7) |
| L1 norm error            | 0 (0)          | 0.28 (0.018)    | 0.189 (0.00876)  | 0.502 (0.0179)  | 0.0899 (0.00315) | 0.398 (0.00892) | 0.217 (0.00579) | 0.38 (0.0172)   |
| Bray-Curtis distance     | 0 (0)          | 0.14 (0.00901)  | 0.0944 (0.00438) | 0.251 (0.00896) | 0.045 (0.00158)  | 0.199 (0.00446) | 0.108 (0.0029)  | 0.19 (0.00859)  |
| Alpha diversity          |                |                 |                  |                 |                  |                 |                 |                 |
| Taxon counts             | 12 (0)         | 5.4 (0.245)     | 20.2 (0.97)      | 6 (0)           | 23.2 (0.2)       | 37.6 (0.245)    | 22.2 (0.49)     | 7.8 (0.583)     |
| Shannon diversity        | 1.34 (0.0092)  | 1.03 (0.0248)   | 1.56 (0.015)     | 1.02 (0.0308)   | 1.26 (0.00675)   | 2.04 (0.0129)   | 1.18 (0.00578)  | 1.19 (0.0336)   |
| Shannon equitability     | 0.541 (0.0037) | 0.615 (0.0122)  | 0.519 (0.00472)  | 0.571 (0.0172)  | 0.402 (0.00264)  | 0.562 (0.00361) | 0.358 (0.00175) | 0.583 (0.0253)  |

### c class - CAMI I high complexity dataset

| Presence/absence of taxa |                 |                 |                 |                 |                  |                 |                 |                 |
|--------------------------|-----------------|-----------------|-----------------|-----------------|------------------|-----------------|-----------------|-----------------|
| Tool                     | Gold standard   | CommonKmers     | FOCUS           | Metaphlan       | MetaPhyler       | Quirk           | TIPP            | mOTU            |
| Completeness (recall)    | 1 (0)           | 0.514 (0.00952) | 0.829 (0.019)   | 0.705 (0.00952) | 0.952 (0)        | 1 (0)           | 0.99 (0.00952)  | 0.695 (0.0323)  |
| Purity (precision)       | 1 (0)           | 0.967 (0.0204)  | 0.597 (0.0159)  | 0.881 (0.00147) | 0.388 (0.00385)  | 0.375 (0.00474) | 0.445 (0.00587) | 0.819 (0.0228)  |
| F1 score                 | 1 (0)           | 0.671 (0.0079)  | 0.694 (0.0134)  | 0.783 (0.00654) | 0.551 (0.00389)  | 0.546 (0.00501) | 0.514 (0.00655) | 0.751 (0.0271)  |
| True positives           | 21 (0)          | 17.4 (0.4)      | 14.8 (0.2)      | 20 (0)          | 20 (0)           | 20 (0)          | 20.8 (0.2)      | 14.6 (0.678)    |
| False positives          | 0 (0)           | 0.4 (0.245)     | 11.8 (0.8)      | 2 (0)           | 31.6 (0.51)      | 35 (0.701)      | 28 (0.548)      | 3.2 (0.374)     |
| False negatives          | 0 (0)           | 10.2 (0.2)      | 3.6 (0.4)       | 6.2 (0.2)       | 1 (0)            | 0 (0)           | 0.2 (0.2)       | 6.4 (0.678)     |
| Jaccard index            | 1 (0)           | 0.505 (0.00891) | 0.531 (0.0157)  | 0.643 (0.0087)  | 0.38 (0.00371)   | 0.375 (0.00474) | 0.443 (0.00686) | 0.605 (0.0332)  |
| Abundance estimates      |                 |                 |                 |                 |                  |                 |                 |                 |
| Weighted UniFrac error   | 0 (0)           | 7.65 (0.0572)   | 7.79 (0.0963)   | 8.49 (0.0828)   | 6.45 (0.0196)    | 7.81 (0.0582)   | 7 (0.0352)      | 8.74 (0.0447)   |
| Unweighted UniFrac error | 0 (0)           | 5.56e+03 (97.8) | 5.52e+03 (79.2) | 6.27e+03 (39.1) | 5.22e+03 (38.3)  | 1e+04 (148)     | 7.46e+03 (49.6) | 6.48e+03 (68.7) |
| L1 norm error            | 0 (0)           | 0.364 (0.00923) | 0.285 (0.0206)  | 0.834 (0.0225)  | 0.187 (0.00562)  | 0.398 (0.00738) | 0.329 (0.00976) | 0.531 (0.0198)  |
| Bray-Curtis distance     | 0 (0)           | 0.182 (0.00462) | 0.143 (0.0103)  | 0.417 (0.0112)  | 0.0935 (0.00281) | 0.199 (0.00369) | 0.165 (0.00488) | 0.265 (0.00889) |
| Alpha diversity          |                 |                 |                 |                 |                  |                 |                 |                 |
| Taxon counts             | 21 (0)          | 11.2 (0.374)    | 29.2 (0.97)     | 16.8 (0.2)      | 51.6 (0.51)      | 56 (0.707)      | 46.8 (0.583)    | 17.8 (0.583)    |
| Shannon diversity        | 2.16 (0.0136)   | 1.83 (0.0247)   | 2.23 (0.0199)   | 2.01 (0.0353)   | 2.03 (0.0124)    | 2.71 (0.00896)  | 1.91 (0.00945)  | 1.92 (0.0155)   |
| Shannon equitability     | 0.709 (0.00445) | 0.757 (0.00674) | 0.661 (0.00278) | 0.711 (0.0141)  | 0.515 (0.00234)  | 0.673 (0.00413) | 0.475 (0.00225) | 0.667 (0.00594) |

### h superkingdom - CAMI II mouse gut dataset

| Presence/absence of taxa |               |                   |                  |               |                     |                  |                    |                 |
|--------------------------|---------------|-------------------|------------------|---------------|---------------------|------------------|--------------------|-----------------|
| Tool                     | Gold standard | CommonKmers       | FOCUS            | Metaphlan     | MetaPhyler          | Quirk            | TIPP               | mOTU            |
| Completeness (recall)    | 1 (0)         | 1 (0)             | 1 (0)            | 1 (0)         | 1 (0)               | 1 (0)            | 1 (0)              | 1 (0)           |
| Purity (precision)       | 1 (0)         | 0.922 (0.0229)    | 0.555 (0.0197)   | 1 (0)         | 0.5 (0)             | 0.333 (0)        | 0.5 (0)            | 1 (0)           |
| F1 score                 | 1 (0)         | 0.948 (0.0152)    | 0.703 (0.0131)   | 1 (0)         | 0.667 (0)           | 0.5 (0)          | 0.667 (0)          | 1 (0)           |
| True positives           | 1 (0)         | 1 (0)             | 1 (0)            | 1 (0)         | 1 (0)               | 1 (0)            | 1 (0)              | 1 (0)           |
| False positives          | 0 (0)         | 0.156 (0.0457)    | 0.891 (0.0393)   | 0 (0)         | 1 (0)               | 2 (0)            | 1 (0)              | 0 (0)           |
| False negatives          | 0 (0)         | 0 (0)             | 0 (0)            | 0 (0)         | 0 (0)               | 0 (0)            | 0 (0)              | 0 (0)           |
| Jaccard index            | 1 (0)         | 0.922 (0.0229)    | 0.555 (0.0197)   | 1 (0)         | 0.5 (0)             | 0.333 (0)        | 0.5 (0)            | 1 (0)           |
| Abundance estimates      |               |                   |                  |               |                     |                  |                    |                 |
| Weighted UniFrac error   | 0 (0)         | 3.75 (0.184)      | 6.69 (0.364)     | 2.98 (0.124)  | 4.32 (0.0691)       | 7.27 (0.0765)    | 4.65 (0.078)       | 4.95 (0.196)    |
| Unweighted UniFrac error | 0 (0)         | 1.59e+03 (71.8)   | 2.47e+03 (98.2)  | 1.78e+03 (86) | 7.86e+03 (154)      | 7.15e+03 (81.4)  | 5.36e+03 (88.9)    | 1.96e+03 (76.7) |
| L1 norm error            | 0 (0)         | 0.00459 (0.00309) | 0.0644 (0.00389) | 0 (0)         | 0.000428 (3.15e-05) | 0.0025 (0.0217)  | 0.00581 (0.000197) | 0 (0)           |
| Bray-Curtis distance     | 0 (0)         | 0.00229 (0.00154) | 0.0322 (0.00194) | 0 (0)         | 0.000214 (1.55e-05) | 0.0462 (0.00109) | 0.0029 (9.87e-05)  | 0 (0)           |
| Alpha diversity          |               |                   |                  |               |                     |                  |                    |                 |
| Taxon counts             | 1 (0)         | 1.16 (0.0457)     | 1.89 (0.0393)    | 1 (0)         | 2 (0)               | 3 (0)            | 2 (0)              | 1 (0)           |
| Shannon diversity        | 0 (0)         | 0.00871 (0.00558) | 0.137 (0.00753)  | 0 (0)         | 0.00198 (0.000134)  | 0.216 (0.00378)  | 0.0197 (0.000583)  | 0 (0)           |
| Shannon equitability     | 0 (0)         | 0.0126 (0.00805)  | 0.197 (0.0109)   | 0 (0)         | 0.00286 (0.000193)  | 0.197 (0.00344)  | 0.0285 (0.000841)  | 0 (0)           |

### i phylum - CAMI II mouse gut dataset

| Presence/absence of taxa |                |                 |                 |                  |                  |                 |                  |                 |
|--------------------------|----------------|-----------------|-----------------|------------------|------------------|-----------------|------------------|-----------------|
| Tool                     | Gold standard  | CommonKmers     | FOCUS           | Metaphlan        | MetaPhyler       | Quirk           | TIPP             | mOTU            |
| Completeness (recall)    | 1 (0)          | 0.898 (0.0142)  | 0.828 (0.0299)  | 0.959 (0.0104)   | 0.985 (0.00634)  | 0.997 (0.00312) | 0.985 (0.00634)  | 0.939 (0.0129)  |
| Purity (precision)       | 1 (0)          | 0.932 (0.0138)  | 0.3 (0.00734)   | 1 (0)            | 0.228 (0.00396)  | 0.139 (0.00255) | 0.189 (0.0034)   | 0.974 (0.00799) |
| F1 score                 | 1 (0)          | 0.91 (0.0115)   | 0.424 (0.0107)  | 0.977 (0.00581)  | 0.369 (0.00522)  | 0.244 (0.00389) | 0.316 (0.00475)  | 0.951 (0.00786) |
| True positives           | 4.67 (0.0773)  | 4.17 (0.0789)   | 3.83 (1.35)     | 4.47 (0.0802)    | 4.59 (0.0729)    | 4.66 (0.0779)   | 4.59 (0.0729)    | 4.38 (0.9848)   |
| False positives          | 0 (0)          | 0.359 (0.0751)  | 9.3 (4.05)      | 8 (0)            | 15.7 (0.171)     | 18 (0.238)      | 19.8 (0.173)     | 0.141 (0.0438)  |
| False negatives          | 0 (0)          | 0.5 (0.0704)    | 0.844 (0.141)   | 0.203 (0.0507)   | 0.0781 (0.0338)  | 0.156 (0.0156)  | 0.0781 (0.0338)  | 0.297 (0.0617)  |
| Jaccard index            | 1 (0)          | 0.847 (0.0188)  | 0.272 (0.00853) | 0.959 (0.0104)   | 0.227 (0.00397)  | 0.139 (0.00256) | 0.189 (0.00343)  | 0.913 (0.0134)  |
| Abundance estimates      |                |                 |                 |                  |                  |                 |                  |                 |
| Weighted UniFrac error   | 0 (0)          | 3.75 (0.184)    | 6.69 (0.364)    | 2.98 (0.124)     | 4.32 (0.0691)    | 7.27 (0.0765)   | 4.65 (0.078)     | 4.95 (0.196)    |
| Unweighted UniFrac error | 0 (0)          | 1.59e+03 (71.8) | 2.47e+03 (98.2) | 1.78e+03 (86)    | 7.86e+03 (154)   | 7.15e+03 (81.4) | 5.36e+03 (88.9)  | 1.96e+03 (76.7) |
| L1 norm error            | 0 (0)          | 0.239 (0.027)   | 0.495 (0.065)   | 0.18 (0.0182)    | 0.0624 (0.00655) | 0.557 (0.179)   | 0.159 (0.0102)   | 0.273 (0.358)   |
| Bray-Curtis distance     | 0 (0)          | 0.12 (0.0135)   | 0.248 (0.0325)  | 0.0902 (0.00909) | 0.0312 (0.00327) | 0.278 (0.00896) | 0.0794 (0.00509) | 0.136 (0.0179)  |
| Alpha diversity          |                |                 |                 |                  |                  |                 |                  |                 |
| Taxon counts             | 4.67 (0.0773)  | 4.53 (0.102)    | 13.1 (0.504)    | 4.47 (0.0802)    | 20.2 (0.157)     | 33.5 (2.25)     | 24.4 (0.152)     | 4.52 (0.0996)   |
| Shannon diversity        | 0.699 (0.0341) | 0.706 (0.0319)  | 1.24 (0.0289)   | 0.655 (0.0352)   | 0.737 (0.0349)   | 1.69 (0.0175)   | 0.873 (0.0313)   | 0.637 (0.0362)  |
| Shannon equitability     | 0.336 (0.0164) | 0.478 (0.0222)  | 0.52 (0.0183)   | 0.444 (0.0236)   | 0.245 (0.0115)   | 0.48 (0.00456)  | 0.265 (0.0095)   | 0.43 (0.0238)   |

### j class - CAMI II mouse gut dataset

| Presence/absence of taxa |               |                 |                 |                 |                 |                 |                 |                 |
|--------------------------|---------------|-----------------|-----------------|-----------------|-----------------|-----------------|-----------------|-----------------|
| Tool                     | Gold standard | CommonKmers     | FOCUS           | Metaphlan       | MetaPhyler      | Quirk           | TIPP            | mOTU            |
| Completeness (recall)    | 1 (0)         | 0.661 (0.0119)  | 0.286 (0.0288)  | 0.813 (0.0104)  | 0.992 (0.00341) | 0.761 (0.00899) | 0.992 (0.00341) | 0.818 (0.0113)  |
| Purity (precision)       | 1 (0)         | 0.757 (0.0132)  | 0.266 (0.0134)  | 1 (0)           | 0.227 (0.00475) | 0.195 (0.00333) | 0.207 (0.00483) | 0.916 (0.0115)  |
| F1 score                 | 1 (0)         | 0.698 (0.00872) | 0.426 (0.00952) | 0.895 (0.00632) | 0.368 (0.00636) | 0.257 (0.00478) | 0.341 (0.00669) | 0.858 (0.00704) |
| True positives           | 9.69 (0.215)  | 6.52 (0.17)     | 6.16 (0.31)     | 8 (0.173)       | 9.81 (0.216)    | 7.5 (0.174)     | 9.81 (0.216)    | 8.05 (0.179)    |
| False positives          | 0 (0)         | 2.17 (0.142)    | 13.9 (0.559)    | 0 (0)           | 33.5 (0.375)    | 16.6 (3.71)     | 37.9 (0.454)    | 0.812 (0.113)   |
| False negatives          | 0 (0)         | 3.38 (0.15)     | 3.73 (0.298)    | 1.89 (0.118)    | 0.0781 (0.0338) | 2.39 (0.106)    | 0.0781 (0.0338) | 1.84 (0.126)    |
| Jaccard index            | 1 (0)         | 0.541 (0.0104)  | 0.248 (0.0121)  | 0.813 (0.0104)  | 0.227 (0.00476) | 0.148 (0.00318) | 0.206 (0.00485) | 0.755 (0.0111)  |
| Abundance estimates      |               |                 |                 |                 |                 |                 |                 |                 |
| Weighted UniFrac error   | 0 (0)         | 3.75 (0.184)    | 6.69 (0.364)    | 2.98 (0.124)    | 4.32 (0.0691)   | 7.27 (0.0765)   | 4.65 (0.078)    | 4.95 (0.196)    |
| Unweighted UniFrac error | 0 (0)         | 1.59e+03 (71.8) | 2.47e+03 (98.2) | 1.78e+03 (86)   | 7.86e+03 (154)  | 7.15e+03 (81.4) | 5.36e+03 (88.9) | 1.96e+03 (76.7) |
| L1 norm error            | 0 (0)         | 0.323 (0.0261)  | 0.584 (0.0627)  | 0.215 (0.0178)  | 0.0984 (0.008)  | 0.66 (0         |                 |                 |

Worst Median Best

### d order - CAMI I high complexity dataset

| Presence/absence of taxa |                 |                 |                 |                 |                 |                 |                 |                 |
|--------------------------|-----------------|-----------------|-----------------|-----------------|-----------------|-----------------|-----------------|-----------------|
| Tool                     | Gold standard   | CommonKmers     | FOCUS           | Metaphlan       | MetaPhyler      | Quirk           | TIPP            | mOTU            |
| Completeness (recall)    | 1 (0)           | 0.535 (0.017)   | 0.78 (0.0215)   | 0.675 (0.0112)  | 0.975 (0)       | 1 (0)           | 0.995 (0.005)   | 0.72 (0.0122)   |
| Purity (precision)       | 1 (0)           | 0.983 (0.0104)  | 0.547 (0.00775) | 0.763 (0.00607) | 0.323 (0.00182) | 0.355 (0.00412) | 0.369 (0.00171) | 0.566 (0.0129)  |
| F1 score                 | 1 (0)           | 0.692 (0.013)   | 0.643 (0.0126)  | 0.716 (0.00796) | 0.486 (0.00205) | 0.524 (0.0045)  | 0.538 (0.00203) | 0.633 (0.0106)  |
| True positives           | 40 (0)          | 21.4 (0.678)    | 31.2 (0.86)     | 27 (0.447)      | 39 (0)          | 40 (0)          | 39.8 (2.0)      | 28.8 (0.49)     |
| False positives          | 0 (0)           | 0.4 (0.245)     | 25.8 (0.2)      | 8.4 (0.245)     | 81.6 (0.678)    | 72.8 (1.32)     | 68.2 (0.583)    | 22.2 (1.1)      |
| False negatives          | 0 (0)           | 18.6 (0.678)    | 8.8 (0.86)      | 13 (0.447)      | 1 (0)           | 0 (0)           | 0.2 (0.2)       | 11.2 (0.49)     |
| Jaccard index            | 1 (0)           | 0.53 (0.0149)   | 0.474 (0.0135)  | 0.558 (0.00964) | 0.321 (0.00179) | 0.355 (0.00412) | 0.368 (0.0019)  | 0.464 (0.0114)  |
| Abundance estimates      |                 |                 |                 |                 |                 |                 |                 |                 |
| Weighted UniFrac error   | 0 (0)           | 7.65 (0.0572)   | 7.79 (0.0963)   | 8.49 (0.0828)   | 6.45 (0.0196)   | 7.81 (0.0582)   | 7 (0.0352)      | 8.74 (0.0447)   |
| Unweighted UniFrac error | 0 (0)           | 5.56e+03 (97.8) | 5.52e+03 (79.2) | 6.27e+03 (39.1) | 6.22e+03 (39.3) | 1e+04 (148)     | 7.46e+03 (49.6) | 6.48e+03 (68.7) |
| L1 norm error            | 0 (0)           | 0.567 (0.00963) | 0.47 (0.0256)   | 1.13 (0.0227)   | 0.619 (0.0197)  | 0.548 (0.0178)  | 0.818 (0.0043)  | 1.08 (0.0194)   |
| Bray-Curtis distance     | 0 (0)           | 0.284 (0.00492) | 0.235 (0.0128)  | 0.563 (0.0113)  | 0.34 (0.000935) | 0.324 (0.0089)  | 0.409 (0.00215) | 0.538 (0.00971) |
| Alpha diversity          |                 |                 |                 |                 |                 |                 |                 |                 |
| Taxon counts             | 40 (0)          | 21.8 (0.86)     | 57 (0.837)      | 35.4 (0.51)     | 121 (0.678)     | 113 (1.32)      | 108 (0.707)     | 51 (1.22)       |
| Shannon diversity        | 2.76 (0.0147)   | 2.24 (0.0276)   | 2.9 (0.0287)    | 2.63 (0.0379)   | 3.13 (0.0114)   | 3.54 (0.00904)  | 3.04 (0.00761)  | 2.58 (0.0143)   |
| Shannon equitability     | 0.747 (0.00399) | 0.728 (0.00297) | 0.717 (0.00589) | 0.739 (0.0129)  | 0.852 (0.00193) | 0.75 (0.00344)  | 0.626 (0.00158) | 0.657 (0.0054)  |

### e family - CAMI I high complexity dataset

| Presence/absence of taxa |                |                 |                 |                 |                  |                 |                 |                 |
|--------------------------|----------------|-----------------|-----------------|-----------------|------------------|-----------------|-----------------|-----------------|
| Tool                     | Gold standard  | CommonKmers     | FOCUS           | Metaphlan       | MetaPhyler       | Quirk           | TIPP            | mOTU            |
| Completeness (recall)    | 1 (0)          | 0.452 (0.0127)  | 0.65 (0.0121)   | 0.573 (0.00455) | 0.92 (0)         | 0.916 (0.00278) | 0.923 (0.00663) | 0.677 (0.0085)  |
| Purity (precision)       | 1 (0)          | 0.966 (0.00986) | 0.536 (0.00884) | 0.849 (0.00738) | 0.322 (0.00104)  | 0.367 (0.00547) | 0.389 (0.0035)  | 0.584 (0.00849) |
| F1 score                 | 1 (0)          | 0.616 (0.0131)  | 0.587 (0.00886) | 0.684 (0.0026)  | 0.477 (0.00114)  | 0.524 (0.00586) | 0.548 (0.00401) | 0.627 (0.00834) |
| True positives           | 88 (0)         | 39.4 (1.1)      | 57.2 (1.07)     | 50.4 (0.4)      | 81 (0)           | 80.6 (2.345)    | 81.2 (0.583)    | 59.6 (0.749)    |
| False positives          | 0 (0)          | 1.4 (0.4)       | 49.6 (0.812)    | 9 (0.548)       | 182 (0.812)      | 139 (2.08)      | 127 (1.33)      | 42.4 (1.33)     |
| False negatives          | 0 (0)          | 48.2 (1.1)      | 37.6 (1.07)     | 7 (0)           | 7.4 (0.245)      | 6.8 (0.583)     | 28.4 (0.749)    |                 |
| Jaccard index            | 1 (0)          | 0.445 (0.0136)  | 0.416 (0.00879) | 0.52 (0.003)    | 0.313 (0.000988) | 0.355 (0.00537) | 0.377 (0.0038)  | 0.457 (0.00876) |
| Abundance estimates      |                |                 |                 |                 |                  |                 |                 |                 |
| Weighted UniFrac error   | 0 (0)          | 7.65 (0.0572)   | 7.79 (0.0963)   | 8.49 (0.0828)   | 6.45 (0.0196)    | 7.81 (0.0582)   | 7 (0.0352)      | 8.74 (0.0447)   |
| Unweighted UniFrac error | 0 (0)          | 5.56e+03 (97.8) | 5.52e+03 (79.2) | 6.27e+03 (39.1) | 6.22e+03 (39.3)  | 1e+04 (148)     | 7.46e+03 (49.6) | 6.48e+03 (68.7) |
| L1 norm error            | 0 (0)          | 0.923 (0.0222)  | 0.787 (0.0172)  | 1.24 (0.0155)   | 0.442 (0.00771)  | 0.975 (0.0168)  | 0.508 (0.0113)  | 1.01 (0.0112)   |
| Bray-Curtis distance     | 0 (0)          | 0.461 (0.0111)  | 0.393 (0.00858) | 0.62 (0.00775)  | 0.221 (0.00386)  | 0.487 (0.00842) | 0.254 (0.00567) | 0.505 (0.0056)  |
| Alpha diversity          |                |                 |                 |                 |                  |                 |                 |                 |
| Taxon counts             | 88 (0)         | 41.2 (0.97)     | 107 (1.16)      | 59.4 (0.872)    | 251 (0.812)      | 220 (2.97)      | 209 (2.01)      | 102 (0.632)     |
| Shannon diversity        | 3.74 (0.00852) | 3.06 (0.0231)   | 4.05 (0.0197)   | 2.92 (0.0576)   | 3.97 (0.0127)    | 4.7 (0.00168)   | 3.9 (0.0146)    | 3.15 (0.00654)  |
| Shannon equitability     | 0.835 (0.0019) | 0.824 (0.00373) | 0.868 (0.00349) | 0.715 (0.0164)  | 0.717 (0.00196)  | 0.871 (0.00239) | 0.697 (0.00269) | 0.681 (0.00122) |

### f genus - CAMI I high complexity dataset

| Presence/absence of taxa |                 |                 |                 |                 |                  |                 |                  |                 |
|--------------------------|-----------------|-----------------|-----------------|-----------------|------------------|-----------------|------------------|-----------------|
| Tool                     | Gold standard   | CommonKmers     | FOCUS           | Metaphlan       | MetaPhyler       | Quirk           | TIPP             | mOTU            |
| Completeness (recall)    | 1 (0)           | 0.269 (0.00412) | 0.246 (0.00526) | 0.314 (0)       | 0.432 (0.00103)  | 0.593 (0.0118)  | 0.431 (0.00126)  | 0.336 (0.0064)  |
| Purity (precision)       | 1 (0)           | 0.772 (0.00902) | 0.265 (0.00768) | 0.761 (0.00934) | 0.146 (0.000378) | 0.186 (0.00433) | 0.193 (0.000963) | 0.306 (0.00499) |
| F1 score                 | 1 (0)           | 0.399 (0.00532) | 0.255 (0.00582) | 0.445 (0.00158) | 0.218 (0.000418) | 0.283 (0.0062)  | 0.267 (0.001)    | 0.32 (0.00552)  |
| True positives           | 194 (0)         | 52.2 (0.8)      | 47.8 (1.02)     | 61 (0)          | 83.8 (0.2)       | 115 (2.29)      | 83.6 (2.345)     | 65.2 (1.24)     |
| False positives          | 0 (0)           | 15.4 (0.678)    | 133 (4.23)      | 19.2 (0.97)     | 490 (2.06)       | 504 (3.07)      | 350 (2.18)       | 148 (1.56)      |
| False negatives          | 0 (0)           | 142 (0.8)       | 146 (1.02)      | 133 (0)         | 110 (0.2)        | 79 (2.28)       | 110 (0.245)      | 129 (1.24)      |
| Jaccard index            | 1 (0)           | 0.249 (0.00415) | 0.146 (0.00383) | 0.286 (0.00131) | 0.123 (0.000263) | 0.165 (0.00418) | 0.154 (0.000666) | 0.191 (0.00391) |
| Abundance estimates      |                 |                 |                 |                 |                  |                 |                  |                 |
| Weighted UniFrac error   | 0 (0)           | 7.65 (0.0572)   | 7.79 (0.0963)   | 8.49 (0.0828)   | 6.45 (0.0196)    | 7.81 (0.0582)   | 7 (0.0352)       | 8.74 (0.0447)   |
| Unweighted UniFrac error | 0 (0)           | 5.56e+03 (97.8) | 5.52e+03 (79.2) | 6.27e+03 (39.1) | 6.22e+03 (39.3)  | 1e+04 (148)     | 7.46e+03 (49.6)  | 6.48e+03 (68.7) |
| L1 norm error            | 0 (0)           | 0.19 (0.0145)   | 1.34 (0.0203)   | 1.5 (0.0108)    | 1.13 (0.0107)    | 1.5 (0.00839)   | 1.2 (0.012)      | 1.4 (0.00979)   |
| Bray-Curtis distance     | 0 (0)           | 0.589 (0.00728) | 0.669 (0.0101)  | 0.752 (0.00539) | 0.564 (0.00534)  | 0.748 (0.00442) | 0.599 (0.00602)  | 0.698 (0.00489) |
| Alpha diversity          |                 |                 |                 |                 |                  |                 |                  |                 |
| Taxon counts             | 194 (0)         | 67.6 (0.872)    | 181 (4.24)      | 80.2 (0.97)     | 574 (2.2)        | 619 (7.69)      | 433 (2.25)       | 213 (1.79)      |
| Shannon diversity        | 4.54 (0.0151)   | 3.42 (0.0238)   | 4.61 (0.0258)   | 3.09 (0.0632)   | 4.84 (0.0176)    | 5.74 (0.00678)  | 4.78 (0.0127)    | 3.57 (0.0198)   |
| Shannon equitability     | 0.862 (0.00286) | 0.813 (0.00443) | 0.887 (0.00291) | 0.706 (0.0154)  | 0.762 (0.00225)  | 0.882 (0.00178) | 0.748 (0.00189)  | 0.686 (0.00205) |

### k order - CAMI II mouse gut dataset

| Presence/absence of taxa |                |                 |                 |                 |                 |                 |                 |                 |
|--------------------------|----------------|-----------------|-----------------|-----------------|-----------------|-----------------|-----------------|-----------------|
| Tool                     | Gold standard  | CommonKmers     | FOCUS           | Metaphlan       | MetaPhyler      | Quirk           | TIPP            | mOTU            |
| Completeness (recall)    | 1 (0)          | 0.667 (0.0115)  | 0.562 (0.0227)  | 0.748 (0.011)   | 0.97 (0.00616)  | 0.791 (0.0102)  | 0.967 (0.00632) | 0.749 (0.0136)  |
| Purity (precision)       | 1 (0)          | 0.773 (0.0193)  | 0.184 (0.00911) | 1 (0)           | 0.115 (0.00286) | 0.103 (0.00306) | 0.112 (0.00311) | 0.825 (0.0177)  |
| F1 score                 | 1 (0)          | 0.705 (0.011)   | 0.3 (0.00819)   | 0.853 (0.00729) | 0.204 (0.0046)  | 0.182 (0.0049)  | 0.2 (0.00502)   | 0.771 (0.00945) |
| True positives           | 12 (0.325)     | 7.97 (2.256)    | 6.7 (3.373)     | 8.81 (0.199)    | 11.6 (3.14)     | 9.47 (2.295)    | 8.1 (3.17)      | 8.83 (0.223)    |
| False positives          | 0 (0)          | 2.52 (0.237)    | 26.8 (1.1)      | 0 (0)           | 89.3 (8.845)    | 82 (0.65)       | 82 (0.888)      | 2.27 (0.282)    |
| False negatives          | 0 (0)          | 3.98 (0.175)    | 5.25 (0.343)    | 3.14 (0.194)    | 0.375 (0.0755)  | 2.48 (0.12)     | 0.406 (0.0762)  | 3.12 (0.214)    |
| Jaccard index            | 1 (0)          | 0.551 (0.0127)  | 0.161 (0.00683) | 0.748 (0.011)   | 0.114 (0.00285) | 0.101 (0.00298) | 0.112 (0.0031)  | 0.634 (0.0129)  |
| Abundance estimates      |                |                 |                 |                 |                 |                 |                 |                 |
| Weighted UniFrac error   | 0 (0)          | 3.75 (0.184)    | 6.69 (0.364)    | 2.98 (0.124)    | 4.32 (0.0691)   | 7.27 (0.0765)   | 4.65 (0.078)    | 4.95 (0.196)    |
| Unweighted UniFrac error | 0 (0)          | 1.59e+03 (71.8) | 2.47e+03 (98.2) | 1.78e+03 (86)   | 7.66e+03 (154)  | 7.15e+03 (81.4) | 5.36e+03 (88.9) | 1.96e+03 (76.7) |
| L1 norm error            | 0 (0)          | 0.318 (0.0258)  | 0.646 (0.06)    | 0.22 (0.0179)   | 0.112 (0.00816) | 0.773 (0.143)   | 0.227 (0.0128)  | 0.374 (0.0348)  |
| Bray-Curtis distance     | 0 (0)          | 0.159 (0.0129)  | 0.323 (0.03)    | 0.11 (0.00895)  | 0.056 (0.00408) | 0.387 (0.00715) | 0.113 (0.0064)  | 0.187 (0.0174)  |
| Alpha diversity          |                |                 |                 |                 |                 |                 |                 |                 |
| Taxon counts             | 12 (0.325)     | 10.5 (0.305)    | 33.5 (1.41)     | 8.81 (0.199)    | 101 (9.16)      | 91.5 (6.82)     | 104 (0.95)      | 11.1 (0.404)    |
| Shannon diversity        | 1.02 (0.0339)  | 0.976 (0.0342)  | 1.84 (0.0436)   | 0.901 (0.034)   | 1.18 (0.0389)   | 2.54 (0.0275)   | 1.37 (0.0354)   | 0.894 (0.0399)  |
| Shannon equitability     | 0.313 (0.0104) | 0.42 (0.0145)   | 0.568 (0.0156)  | 0.42 (0.0163)   | 0.256 (0.00821) | 0.562 (0.00555) | 0.282 (0.00727) | 0.38 (0.0169)   |

### l family - CAMI II mouse gut dataset

| Presence/absence of taxa |                |                 |                 |                 |                 |                 |                 |                 |
|--------------------------|----------------|-----------------|-----------------|-----------------|-----------------|-----------------|-----------------|-----------------|
| Tool                     | Gold standard  | CommonKmers     | FOCUS           | Metaphlan       | MetaPhyler      | Quirk           | TIPP            | mOTU            |
| Completeness (recall)    | 1 (0)          | 0.618 (0.0104)  | 0.476 (0.0233)  | 0.742 (0.009)   | 0.875 (0.00854) | 0.694 (0.00786) | 0.867 (0.00891) | 0.712 (0.0105)  |
| Purity (precision)       | 1 (0)          | 0.783 (0.0214)  | 0.203 (0.00956) | 0.963 (0.00224) | 0.099 (0.0192)  | 0.097 (0.00239) | 0.107 (0.00247) | 0.774 (0.0165)  |
| F1 score                 | 1 (0)          | 0.677 (0.0105)  | 0.311 (0.00757) | 0.836 (0.00644) | 0.177 (0.0308)  | 0.174 (0.00367) | 0.19 (0.0037)   | 0.732 (0.0085)  |
| True positives           | 23.4 (0.621)   | 14.4 (3.92)     | 11.1 (0.598)    | 17.2 (0.399)    | 20.2 (0.448)    | 16.1 (2.402)    | 20 (0.44)       | 16.4 (0.337)    |
| False positives          | 0 (0)          | 4.42 (0.513)    | 38.5 (1.67)     | 0.703 (0.0988)  | 186 (8.39)      | 146 (1.19)      | 168 (2.15)      | 5.41 (0.545)    |
| False negatives          | 0 (0)          | 9.02 (0.362)    | 12.3 (0.645)    | 6.19 (0.312)    | 3.12 (0.256)    | 7.25 (2.296)    | 3.33 (0.274)    | 6.98 (0.382)    |
| Jaccard index            | 1 (0)          | 0.517 (0.0115)  | 0.167 (0.00824) | 0.722 (0.00961) | 0.0975 (0.0186) | 0.0953 (0.0022) | 0.105 (0.00238) | 0.582 (0.0113)  |
| Abundance estimates      |                |                 |                 |                 |                 |                 |                 |                 |
| Weighted UniFrac error   | 0 (0)          | 3.75 (0.184)    | 6.69 (0.364)    | 2.98 (0.124)    | 4.32 (0.0691)   | 7.27 (0.0765)   | 4.65 (0.078)    | 4.95 (0.196)    |
| Unweighted UniFrac error | 0 (0)          | 1.59e+03 (71.8) | 2.47e+03 (98.2) | 1.78e+03 (86)   | 7.66e+03 (154)  | 7.15e+03 (81.4) | 5.36e+03 (88.9) | 1.96e+03 (76.7) |
| L1 norm error            | 0 (0)          | 0.536 (0.0445)  | 0.863 (0.0587)  | 0.273 (0.0172)  | 0.267 (0.0133)  | 1.07 (0.0182)   | 0.329 (0.0155)  | 0.482 (0.0372)  |
| Bray-Curtis distance     | 0 (0)          | 0.268 (0.0223)  | 0.431 (0.0293)  | 0.137 (0.00861) | 0.133 (0.00664) | 0.535 (0.00908) | 0.165 (0.00773) | 0.241 (0.0186)  |
| Alpha diversity          |                |                 |                 |                 |                 |                 |                 |                 |
| Taxon counts             | 23.4 (0.621)   | 18.8 (0.504)    | 49.5 (2.19)     | 17.9 (0.43)     | 205 (2.5)       | 162 (1.24)      | 188 (2.18)      | 21.8 (0.674)    |
| Shannon diversity        | 1.51 (0.0575)  | 1.45 (0.0522)   | 2.33 (0.0711)   | 1.36 (0.0572)   | 1.85 (0.0576)   | 3.39 (0.0356)   | 1.92 (0.0589)   | 1.39 (0.0668)   |
| Shannon equitability     | 0.387 (0.0147) | 0.496 (0.0177)  | 0.633 (0.0145)  | 0.47 (0.0183)   | 0.346 (0.0104)  | 0.667 (0.00635) | 0.346 (0.0106)  | 0.459 (0.0211)  |

### m genus - CAMI II mouse gut dataset

| Presence/absence of taxa |               |                |                 |                 |                 |                  |                  |                 |
|--------------------------|---------------|----------------|-----------------|-----------------|-----------------|------------------|------------------|-----------------|
| Tool                     | Gold standard | CommonKmers    | FOCUS           | Metaphlan       | MetaPhyler      | Quirk            | TIPP             | mOTU            |
| Completeness (recall)    | 1 (0)         | 0.537 (0.0123) | 0.247 (0.0138)  | 0.582 (0.00836) | 0.539 (0.0108)  | 0.487 (0.0123)   | 0.528 (0.0109)   | 0.509 (0.00885) |
| Purity (precision)       | 1 (0)         | 0.772 (0.0234) | 0.163 (0.00873) | 0.944 (0.00543) | 0.0654 (0.0186) | 0.0672 (0.00242) | 0.0646 (0.00241) | 0.689 (0.0167)  |
| F1 score                 | 1 (0)         | 0.635 (0.0123) | 0.212 (0.00729) | 0.718 (0.00637) | 0.116 (0.00292) | 0.117 (0.00389)  | 0.144 (0.00356)  | 0.574 (0.00665) |
| True positives           | 51.9 (1.95)   | 29.5 (0.896)   | 12.8 (0.841)    | 29.5 (0.896)    | 26.9 (0.697)    | 25.1 (1.04)      | 26.4 (0.899)     | 25.6 (0.735)    |
| False positives          | 0 (0)         | 9.02 (1.06)    | 56.9 (2.64)     | 1.7 (0.151)     | 351 (3.35)      | 343 (3.76)       | 288 (4.06)       | 1               |



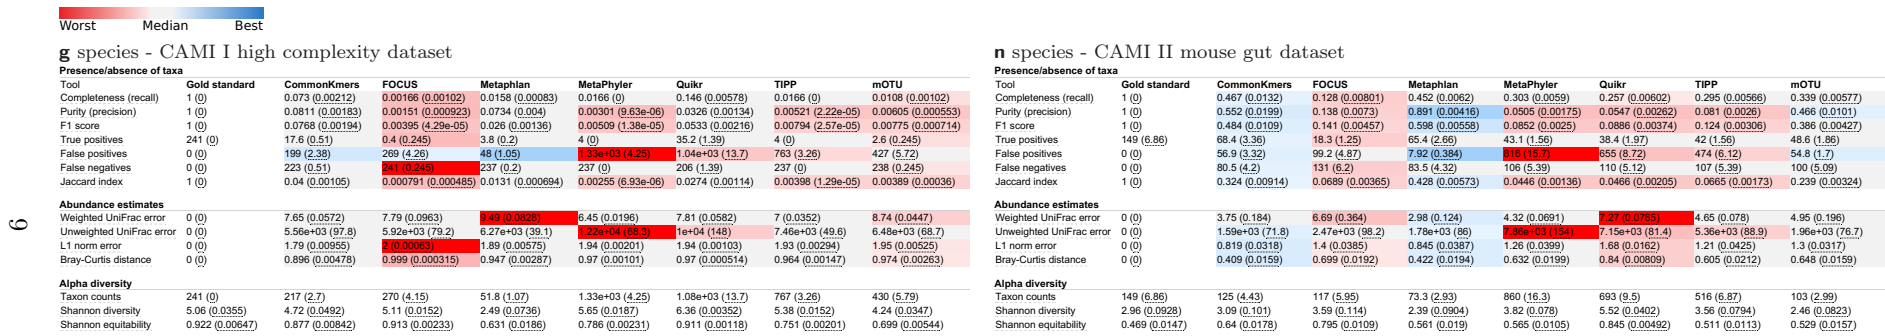

**Fig. S8. Assessment summary of the results of profilers on the CAMI I high complexity (a-g) and the CAMI II mouse gut (h-n) datasets.** The values of the metrics are averaged over all samples in each dataset, with the standard error being shown in parentheses.

Worst Median Best

**a superkingdom - HMP Mock Community dataset**

| Presence/absence of taxa |               |             |        |           |            |          |          |
|--------------------------|---------------|-------------|--------|-----------|------------|----------|----------|
| Tool                     | Gold standard | CommonKmers | FOCUS  | Metaphlan | MetaPhyler | Quikr    | mOTU     |
| Completeness (recall)    | 1             | 1           | 0.667  | 0.667     | 0.667      | 1        | 0.667    |
| Purity (precision)       | 1             | 1           | 1      | 1         | 1          | 1        | 1        |
| F1 score                 | 1             | 1           | 0.8    | 0.8       | 0.8        | 1        | 0.8      |
| True positives           | 3             | 3           | 2      | 2         | 2          | 3        | 2        |
| False positives          | 0             | 0           | 0      | 0         | 0          | 0        | 0        |
| False negatives          | 0             | 0           | 1      | 1         | 1          | 0        | 1        |
| Jaccard index            | 1             | 1           | 0.667  | 0.667     | 0.667      | 1        | 0.667    |
| Abundance estimates      |               |             |        |           |            |          |          |
| Weighted UniFrac error   | 0             | 8.11        | 8.98   | 5.83      | 5.99       | 11.3     | 6.45     |
| Unweighted UniFrac error | 0             | 213         | 475    | 142       | 1.76e+03   | 7.46e+03 | 3.22e+03 |
| L1 norm error            | 0             | 0.206       | 0.324  | 0.241     | 0.24       | 0.134    | 0.171    |
| Bray-Curtis distance     | 0             | 0.103       | 0.162  | 0.12      | 0.12       | 0.0671   | 0.0854   |
| Alpha diversity          |               |             |        |           |            |          |          |
| Taxon counts             | 3             | 3           | 2      | 2         | 2          | 3        | 2        |
| Shannon diversity        | 0.473         | 0.343       | 0.0898 | 0.226     | 0.226      | 0.546    | 0.313    |
| Shannon equitability     | 0.43          | 0.312       | 0.129  | 0.326     | 0.326      | 0.497    | 0.451    |

**b phylum - HMP Mock Community dataset**

| Presence/absence of taxa |               |             |       |           |            |          |          |
|--------------------------|---------------|-------------|-------|-----------|------------|----------|----------|
| Tool                     | Gold standard | CommonKmers | FOCUS | Metaphlan | MetaPhyler | Quikr    | mOTU     |
| Completeness (recall)    | 1             | 0.714       | 0.714 | 0.857     | 0.857      | 0.857    | 0.857    |
| Purity (precision)       | 1             | 0.833       | 0.556 | 1         | 0.75       | 0.176    | 1        |
| F1 score                 | 1             | 0.769       | 0.625 | 0.923     | 0.8        | 0.293    | 0.923    |
| True positives           | 7             | 5           | 5     | 6         | 6          | 6        | 6        |
| False positives          | 0             | 1           | 4     | 0         | 2          | 29       | 0        |
| False negatives          | 0             | 2           | 2     | 1         | 1          | 1        | 1        |
| Jaccard index            | 1             | 0.625       | 0.455 | 0.857     | 0.667      | 0.171    | 0.857    |
| Abundance estimates      |               |             |       |           |            |          |          |
| Weighted UniFrac error   | 0             | 8.11        | 8.98  | 5.83      | 5.99       | 11.3     | 6.45     |
| Unweighted UniFrac error | 0             | 213         | 475   | 142       | 1.76e+03   | 7.46e+03 | 3.22e+03 |
| L1 norm error            | 0             | 0.999       | 0.508 | 0.448     | 0.46       | 1.03     | 0.784    |
| Bray-Curtis distance     | 0             | 0.499       | 0.254 | 0.224     | 0.23       | 0.513    | 0.392    |
| Alpha diversity          |               |             |       |           |            |          |          |
| Taxon counts             | 7             | 6           | 9     | 6         | 8          | 34       | 6        |
| Shannon diversity        | 1.06          | 0.375       | 1.39  | 0.837     | 0.832      | 2.56     | 0.589    |
| Shannon equitability     | 0.542         | 0.209       | 0.635 | 0.467     | 0.4        | 0.726    | 0.329    |

**c class - HMP Mock Community dataset**

| Presence/absence of taxa |               |             |       |           |            |          |          |
|--------------------------|---------------|-------------|-------|-----------|------------|----------|----------|
| Tool                     | Gold standard | CommonKmers | FOCUS | Metaphlan | MetaPhyler | Quikr    | mOTU     |
| Completeness (recall)    | 1             | 0.727       | 0.727 | 0.909     | 0.909      | 0.909    | 0.909    |
| Purity (precision)       | 1             | 0.889       | 0.533 | 1         | 0.625      | 0.204    | 1        |
| F1 score                 | 1             | 0.8         | 0.615 | 0.952     | 0.741      | 0.333    | 0.952    |
| True positives           | 11            | 8           | 8     | 10        | 10         | 10       | 10       |
| False positives          | 0             | 1           | 7     | 0         | 6          | 39       | 0        |
| False negatives          | 0             | 3           | 3     | 1         | 1          | 1        | 1        |
| Jaccard index            | 1             | 0.667       | 0.444 | 0.909     | 0.588      | 0.2      | 0.909    |
| Abundance estimates      |               |             |       |           |            |          |          |
| Weighted UniFrac error   | 0             | 8.11        | 8.98  | 5.83      | 5.99       | 11.3     | 6.45     |
| Unweighted UniFrac error | 0             | 213         | 475   | 142       | 1.76e+03   | 7.46e+03 | 3.22e+03 |
| L1 norm error            | 0             | 0.916       | 0.863 | 0.51      | 0.496      | 1.44     | 0.804    |
| Bray-Curtis distance     | 0             | 0.458       | 0.432 | 0.255     | 0.248      | 0.719    | 0.402    |
| Alpha diversity          |               |             |       |           |            |          |          |
| Taxon counts             | 11            | 9           | 15    | 10        | 16         | 49       | 10       |
| Shannon diversity        | 1.41          | 0.974       | 1.96  | 1.06      | 1.07       | 3        | 0.7      |
| Shannon equitability     | 0.59          | 0.443       | 0.725 | 0.461     | 0.386      | 0.771    | 0.304    |

**d order - HMP Mock Community dataset**

| Presence/absence of taxa |               |             |       |           |            |          |          |
|--------------------------|---------------|-------------|-------|-----------|------------|----------|----------|
| Tool                     | Gold standard | CommonKmers | FOCUS | Metaphlan | MetaPhyler | Quikr    | mOTU     |
| Completeness (recall)    | 1             | 0.769       | 0.615 | 0.923     | 0.923      | 0.923    | 0.846    |
| Purity (precision)       | 1             | 0.667       | 0.4   | 0.8       | 0.353      | 0.125    | 0.846    |
| F1 score                 | 1             | 0.714       | 0.485 | 0.857     | 0.511      | 0.22     | 0.846    |
| True positives           | 13            | 10          | 8     | 12        | 12         | 12       | 11       |
| False positives          | 0             | 5           | 12    | 3         | 22         | 34       | 2        |
| False negatives          | 0             | 3           | 5     | 1         | 1          | 1        | 2        |
| Jaccard index            | 1             | 0.556       | 0.32  | 0.75      | 0.343      | 0.124    | 0.733    |
| Abundance estimates      |               |             |       |           |            |          |          |
| Weighted UniFrac error   | 0             | 8.11        | 8.98  | 5.83      | 5.99       | 11.3     | 6.45     |
| Unweighted UniFrac error | 0             | 213         | 475   | 142       | 1.76e+03   | 7.46e+03 | 3.22e+03 |
| L1 norm error            | 0             | 1.07        | 1.18  | 0.622     | 0.641      | 1.61     | 0.866    |
| Bray-Curtis distance     | 0             | 0.535       | 0.592 | 0.311     | 0.32       | 0.803    | 0.433    |
| Alpha diversity          |               |             |       |           |            |          |          |
| Taxon counts             | 13            | 15          | 20    | 15        | 34         | 96       | 13       |
| Shannon diversity        | 1.77          | 1.35        | 2.07  | 1.46      | 1.46       | 3.55     | 1.14     |
| Shannon equitability     | 0.689         | 0.497       | 0.692 | 0.537     | 0.413      | 0.777    | 0.444    |

**Fig. S9. Assessment summary of the results of profilers on the HMP Mock Community dataset.** This dataset consists of one sample.

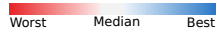

**e family - HMP Mock Community dataset**

| Presence/absence of taxa |               |             |       |           |            |          |          |
|--------------------------|---------------|-------------|-------|-----------|------------|----------|----------|
| Tool                     | Gold standard | CommonKmers | FOCUS | Metaphlan | MetaPhyler | Quikr    | mOTU     |
| Completeness (recall)    | 1             | 0.579       | 0.263 | 0.842     | 0.947      | 0.947    | 0.842    |
| Purity (precision)       | 1             | 0.55        | 0.238 | 0.889     | 0.353      | 0.101    | 0.941    |
| F1 score                 | 1             | 0.564       | 0.25  | 0.865     | 0.514      | 0.183    | 0.889    |
| True positives           | 19            | 11          | 5     | 16        | 18         | 18       | 16       |
| False positives          | 0             | 9           | 16    | 2         | 33         | 160      | 1        |
| False negatives          | 0             | 8           | 14    | 3         | 1          | 1        | 3        |
| Jaccard index            | 1             | 0.393       | 0.143 | 0.762     | 0.346      | 0.101    | 0.8      |
| Abundance estimates      |               |             |       |           |            |          |          |
| Weighted UniFrac error   | 0             | 8.11        | 8.98  | 5.83      | 5.99       | 11.3     | 6.45     |
| Unweighted UniFrac error | 0             | 213         | 475   | 142       | 1.76e+03   | 7.46e+03 | 3.22e+03 |
| L1 norm error            | 0             | 1.13        | 1.25  | 0.657     | 0.678      | 1.72     | 0.902    |
| Bray-Curtis distance     | 0             | 0.563       | 0.624 | 0.328     | 0.339      | 0.861    | 0.451    |
| Alpha diversity          |               |             |       |           |            |          |          |
| Taxon counts             | 19            | 20          | 21    | 18        | 51         | 178      | 17       |
| Shannon diversity        | 1.86          | 1.37        | 2.3   | 1.47      | 1.5        | 4.13     | 1.17     |
| Shannon equitability     | 0.631         | 0.459       | 0.757 | 0.51      | 0.382      | 0.797    | 0.412    |

**f genus - HMP Mock Community dataset**

| Presence/absence of taxa |               |             |       |           |            |          |          |
|--------------------------|---------------|-------------|-------|-----------|------------|----------|----------|
| Tool                     | Gold standard | CommonKmers | FOCUS | Metaphlan | MetaPhyler | Quikr    | mOTU     |
| Completeness (recall)    | 1             | 0.579       | 0.211 | 0.789     | 0.947      | 0.895    | 0.842    |
| Purity (precision)       | 1             | 0.55        | 0.16  | 0.833     | 0.205      | 0.0459   | 0.667    |
| F1 score                 | 1             | 0.564       | 0.182 | 0.811     | 0.336      | 0.0874   | 0.744    |
| True positives           | 19            | 11          | 4     | 15        | 18         | 17       | 16       |
| False positives          | 0             | 9           | 21    | 3         | 70         | 353      | 8        |
| False negatives          | 0             | 8           | 15    | 4         | 1          | 2        | 3        |
| Jaccard index            | 1             | 0.393       | 0.1   | 0.682     | 0.202      | 0.0457   | 0.593    |
| Abundance estimates      |               |             |       |           |            |          |          |
| Weighted UniFrac error   | 0             | 8.11        | 8.98  | 5.83      | 5.99       | 11.3     | 6.45     |
| Unweighted UniFrac error | 0             | 213         | 475   | 142       | 1.76e+03   | 7.46e+03 | 3.22e+03 |
| L1 norm error            | 0             | 1.13        | 1.31  | 0.743     | 0.713      | 1.83     | 0.951    |
| Bray-Curtis distance     | 0             | 0.563       | 0.657 | 0.371     | 0.357      | 0.913    | 0.475    |
| Alpha diversity          |               |             |       |           |            |          |          |
| Taxon counts             | 19            | 20          | 25    | 18        | 88         | 370      | 24       |
| Shannon diversity        | 1.86          | 1.37        | 2.43  | 1.33      | 1.59       | 4.69     | 1.19     |
| Shannon equitability     | 0.631         | 0.459       | 0.753 | 0.458     | 0.356      | 0.792    | 0.375    |

**g species - HMP Mock Community dataset**

| Presence/absence of taxa |               |             |        |           |            |          |          |
|--------------------------|---------------|-------------|--------|-----------|------------|----------|----------|
| Tool                     | Gold standard | CommonKmers | FOCUS  | Metaphlan | MetaPhyler | Quikr    | mOTU     |
| Completeness (recall)    | 1             | 0.409       | 0.136  | 0.591     | 0.955      | 0.227    | 0.818    |
| Purity (precision)       | 1             | 0.321       | 0.0938 | 0.867     | 0.127      | 0.00803  | 0.375    |
| F1 score                 | 1             | 0.36        | 0.111  | 0.703     | 0.225      | 0.0155   | 0.514    |
| True positives           | 22            | 9           | 3      | 13        | 21         | 5        | 18       |
| False positives          | 0             | 19          | 29     | 2         | 144        | 818      | 30       |
| False negatives          | 0             | 13          | 19     | 9         | 1          | 17       | 4        |
| Jaccard index            | 1             | 0.22        | 0.0588 | 0.542     | 0.127      | 0.00781  | 0.346    |
| Abundance estimates      |               |             |        |           |            |          |          |
| Weighted UniFrac error   | 0             | 8.11        | 8.98   | 5.83      | 5.99       | 11.3     | 6.45     |
| Unweighted UniFrac error | 0             | 213         | 475    | 142       | 1.76e+03   | 7.46e+03 | 3.22e+03 |
| L1 norm error            | 0             | 1.39        | 1.71   | 0.656     | 0.767      | 1.97     | 0.953    |
| Bray-Curtis distance     | 0             | 0.694       | 0.854  | 0.328     | 0.384      | 0.986    | 0.476    |
| Alpha diversity          |               |             |        |           |            |          |          |
| Taxon counts             | 22            | 28          | 32     | 15        | 165        | 623      | 48       |
| Shannon diversity        | 1.98          | 2.11        | 2.76   | 1.52      | 2.19       | 5.45     | 1.68     |
| Shannon equitability     | 0.641         | 0.634       | 0.795  | 0.561     | 0.429      | 0.846    | 0.432    |

**Fig. S10. Assessment summary of the results of profilers on the HMP Mock Community dataset.** This dataset consists of one sample.

**a** CAMI I high complexity dataset

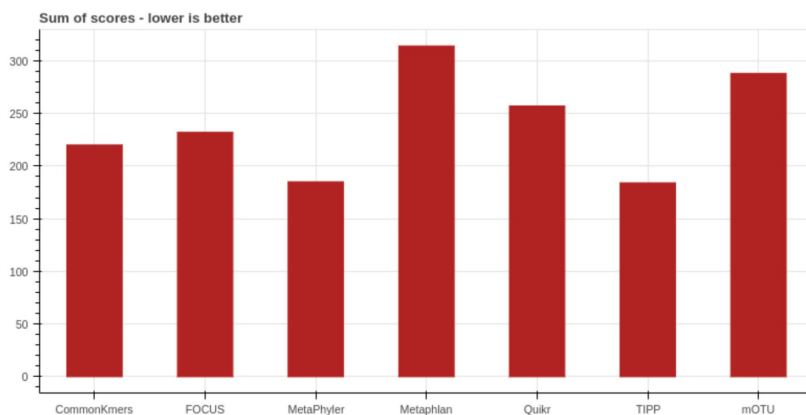

**b** CAMI II mouse gut dataset

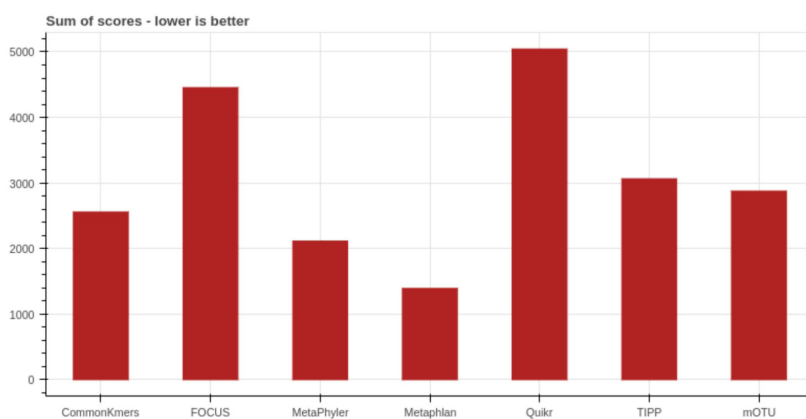

**c** HMP Mock Community dataset

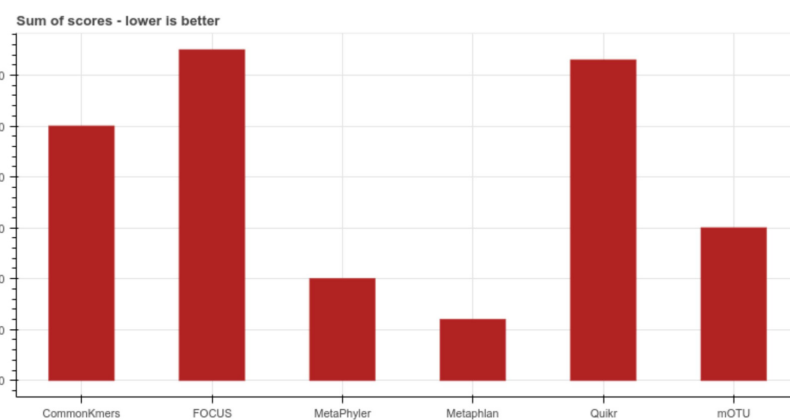

**Fig. S11.** Sum of scores obtained by profilers as a result of their rankings for the metrics completeness, purity, L1 norm, and weighted UniFrac over all major taxonomic ranks. Scores obtained for each metric are given in Fig. 2d in the main document and Fig. S5e,f above. **a**, **b**, and **c** show the sum of scores on the CAMI I high complexity, the CAMI II mouse gut, and the HMP Mock Community datasets, respectively. For details of the scores computation, see main text.

● Gold standard ● CommonKmers ● FOCUS ● Metaphlan ● MetaPhyler ● Quikr ● TIPP ● mOTU

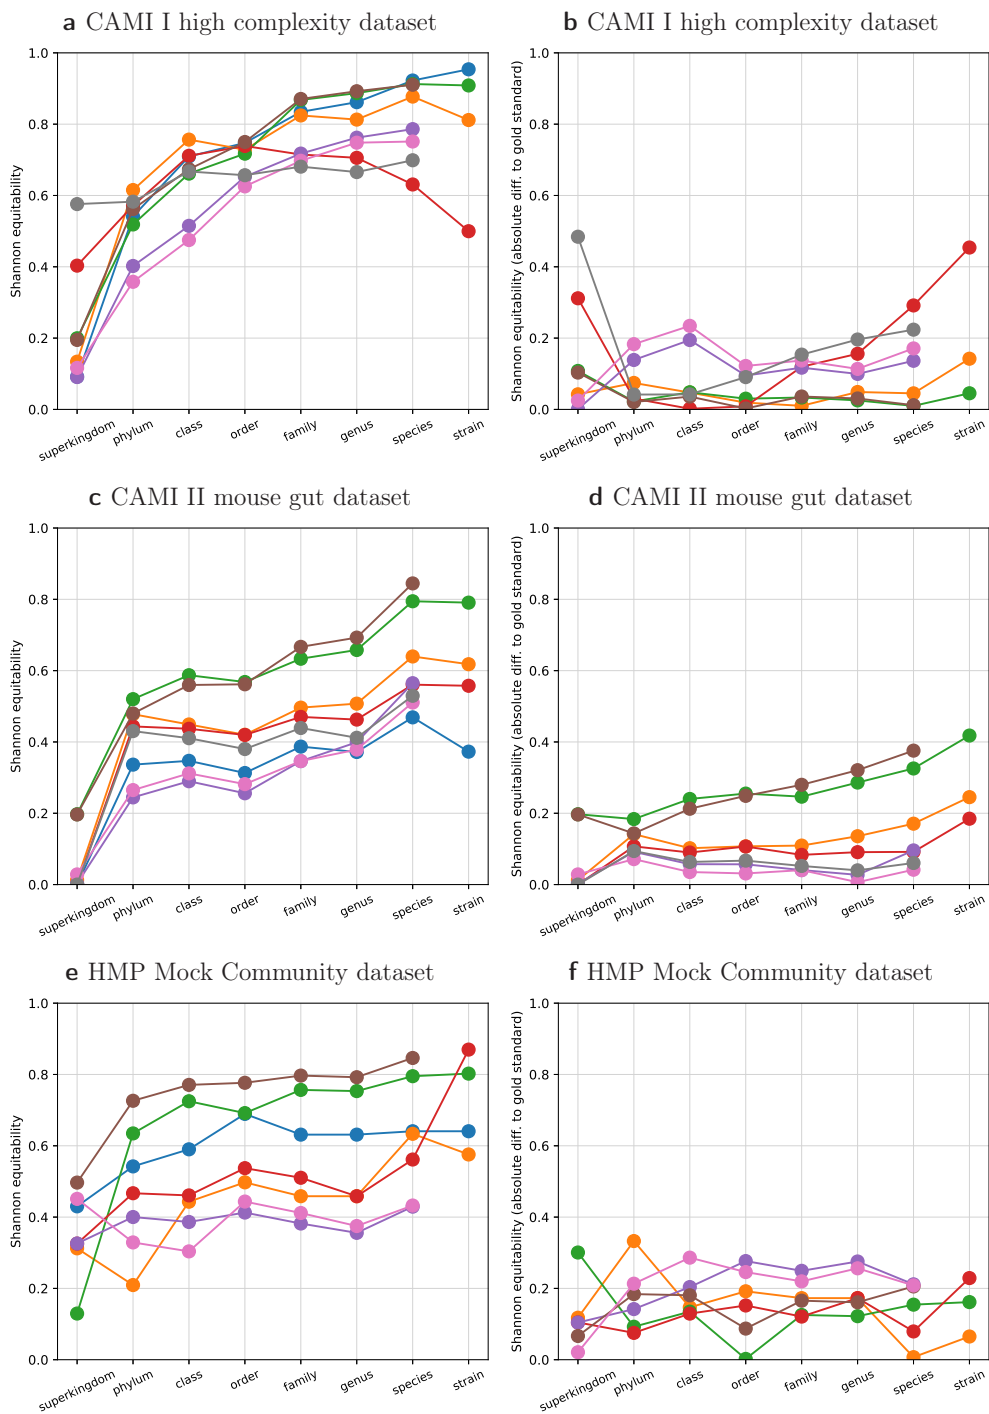

**Fig. S12. Shannon equitability computed from the profiling results on the CAMI I high complexity (a), the CAMI II mouse gut (c), and the HMP Mock Community (e) datasets. b, d, and f show the absolute difference in Shannon equitability of each method to the gold standard. The closer the Shannon equitability of the predicted profile by a method to the gold standard, the better it reflects the actual alpha diversity in the gold standard in terms of evenness of the taxa abundances.**

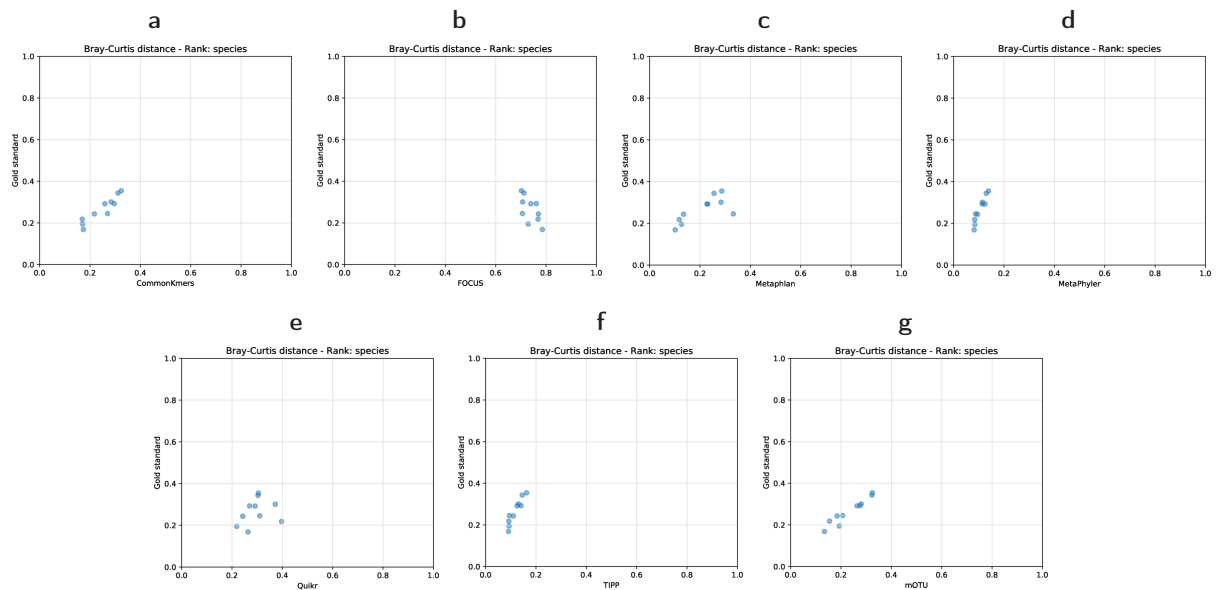

**Fig. S13. Scatter plots of Bray-Curtis distances from the profiling results on the CAMI I high complexity dataset.** The plots visualize beta diversity at the species level. For each profiling method and plot, a point corresponds to the Bray-Curtis distance between the abundance predictions for a pair of input samples by the method (x-axis) and the Bray-Curtis distance computed for the gold standard for the same pair of samples (y-axis). The closer a point is to the line  $x = y$ , the more similar the predicted taxa distributions are to the gold standard.
