# Supplementary material for: Assessing taxonomic metagenome profilers with OPAL
Source: Springer Nature journal article supplement (doi:10.1186/s13059-019-1646-y), 2019-03-04
Supplement: 13059_2019_1646_MOESM2_ESM.pdf [file 13059_2019_1646_MOESM2_ESM.pdf]

Additional file 2

# Assessing taxonomic metagenome profilers with OPAL

Fernando Meyer, Andreas Bremges, Peter Belmann, Stefan Janssen, Alice C. McHardy, David Koslicki

## Reproducing OPAL's comparisons of taxonomic profilers on the CAMI I high complexity dataset

- Download the 5 samples of the CAMI I HC dataset from <https://data.cami-challenge.org/participate> and save all files in the same directory. Your directory should contain:

```
RH_S001__insert_270.fq.gz
RH_S002__insert_270.fq.gz
RH_S003__insert_270.fq.gz
RH_S004__insert_270.fq.gz
RH_S005__insert_270.fq.gz
```

- Pull the Bioboxes of profilers:

```
docker pull stefanjanssen/docker_profiling_tools:commonkmers
docker pull stefanjanssen/docker_profiling_tools:focus
docker pull stefanjanssen/docker_profiling_tools:metaphlan2
docker pull stefanjanssen/docker_profiling_tools:metaphyler
docker pull stefanjanssen/docker_profiling_tools:quicker
docker pull stefanjanssen/docker_profiling_tools:tipp
docker pull stefanjanssen/docker_profiling_tools:motu
```

- CommonKmers uses a database that is not stored inside its Biobox. Download it from <https://zenodo.org/record/1749272/files/CommonKmersData.tar.gz?download=1> (DOI: <http://doi.org/10.5281/zenodo.1749272>) and extract the files. Make sure to set the path to the files with option `--volume` for `opal_workflow.py`, as shown below.

```
wget --content-disposition https://zenodo.org/record/1749272/files/CommonKmersData.tar.gz?download=1
tar -xzf CommonKmersData.tar.gz
```

- Install OPAL (<https://github.com/CAMI-challenge/OPAL>).

- OPAL's tool to run Bioboxes of profilers, measure their run time and maximum memory usage, and automatically assess their results is `opal_workflow.py`. To run it, you also need the gold standard file `gs_cami_i_hc.profile` and the Biobox YAML file `biobox_cami_i_hc.yaml`, which are located in the `data` directory of the OPAL GitHub repository (<https://github.com/CAMI-challenge/OPAL/tree/master/data>).

- Run `opal_workflow.py` as follows, modifying the options in **red** to match your system's paths.

```
./opal_workflow.py \  
stefanjanssen/docker_profiling_tools:commonkmers \  
stefanjanssen/docker_profiling_tools:focus \  
stefanjanssen/docker_profiling_tools:metaphlan2 \  
stefanjanssen/docker_profiling_tools:metaphyler \  
stefanjanssen/docker_profiling_tools:quicker \  
stefanjanssen/docker_profiling_tools:tipp \  
stefanjanssen/docker_profiling_tools:motu
```

```

stefanjanssen/docker_profiling_tools:metaphyler \
stefanjanssen/docker_profiling_tools:quikr \
stefanjanssen/docker_profiling_tools:tipp \
stefanjanssen/docker_profiling_tools:motu \
--labels "CommonKmers, FOCUS, Metaphlan, MetaPhyler, Quikr, TIPP, mOTU" \
--input_dir /path/to/gzipped/fastq/files \
--output_dir /path/to/output_dir \
--yaml /path/to/biobox_cami_i_hc.yaml \
--volume /path/to/CommonKmersData:/exchange/db:ro \
--gold_standard_file /path/to/gs_cami_i_hc.profile \
--plot_abundances \
--desc "1st CAMI Challenge Dataset 3 CAMI high"

```

- The output directory, `output_dir` in this example, will be created if does not exist. It will contain the predictions of all profilers and OPAL's assessments.

### Reproducing OPAL's comparisons of taxonomic profilers on the CAMI II mouse gut dataset

- Download the 64 short-read samples of the CAMI II MG dataset from <https://data.cami-challenge.org/participate>. The files have the same name, but should be located in different sub-directories of the same root directory:

```

2017.12.29_11.37.26_sample_0/reads/anonymous_reads.fq.gz
2017.12.29_11.37.26_sample_1/reads/anonymous_reads.fq.gz
2017.12.29_11.37.26_sample_2/reads/anonymous_reads.fq.gz
...
2017.12.29_11.37.26_sample_63/reads/anonymous_reads.fq.gz

```

- To run `opal_workflow.py`, you also need the gold standard file `gs_cami_i_hc.profile` and the Biobox YAML file `biobox_cami_ii_mg.yaml`, which are located in the `data` directory of the OPAL GitHub repository (<https://github.com/CAMI-challenge/OPAL/tree/master/data>).
- Follow and adapt the other steps given above.

### Reproducing OPAL's comparisons of taxonomic profilers on the HMP MC dataset

- Download the FASTQ file of the HMP MC staggered sample (accession SRX055381) from NCBI SRA (<https://www.ncbi.nlm.nih.gov/sra>) and compress it using `gzip`. You should have file:

```
SRR172903.fastq.gz
```

- To run `opal_workflow.py`, you also need the gold standard file `gs_hmp_mc.profile` and the Biobox YAML file `biobox_hmp_mc.yaml`, which are located in the `data` directory of the OPAL GitHub repository (<https://github.com/CAMI-challenge/OPAL/tree/master/data>).
- Follow and adapt the other steps given above.
